# Supplementary material for: Association of a Healthy Lifestyle with All-Cause, Cause-Specific Mortality and Incident Cancer among Individuals with Metabolic Syndrome: A Prospective Cohort Study in UK Biobank
Source: MDPI journal article supplement (doi:10.3390/ijerph19169936), 2022-08-11
Supplement: s1 [file s1]

## **Supplementary Materials:**

**Table S1.** Healthy lifestyle behavior definitions

**Table S2.** Coding of outcomes

**Table S3.** Characteristics of MetS participants included or excluded from the current study

**Table S4.** Baseline characteristics of MetS participants by weighted lifestyle scores

**Table S5.** Baseline characteristics of MetS participants by unweighted lifestyle scores

**Table S6.** HR (95% CI) for all-cause mortality and overall cancer incidence by individual lifestyle factors

**Table S7.** HR (95% CI) for overall and site-specific cancer by weighted lifestyle categories

**Table S8.** HR (95% CI) for all-cause and cause-specific mortality by unweighted healthy lifestyle scores

**Table S9.** HR (95% CI) for all-cause and cause-specific mortality by weighted lifestyle categories

**Table S10.** Crossover analysis of interaction between lifestyle categories (weighted lifestyle scores) and baseline characteristics on all-cause mortality risk

**Table S11.** Association of unweighted lifestyle scores category with all-cause and cause-specific mortality risk

**Table S12.** Association of unweighted lifestyle scores category with overall and site-specific cancer risk

**Table S13.** HR (95% CI) of all-cause and cause-specific mortality risk according to unweighted lifestyle category with further inclusion of BMI

**Table S14.** HR (95% CI) of overall and site-specific cancer risk according to unweighted lifestyle category with further inclusion of BMI

**Table S15.** HR (95% CI) of all-cause and cause-specific mortality risk according to unweighted lifestyle category with further redefining never smoke as a healthy behavior

**Table S16.** HR (95% CI) of overall and site-specific cancer risk according to unweighted lifestyle category with further redefining never smoke as a healthy behavior

**Figure. S1** Cohort exclusions of the study participants

**Figure. S2** Schoenfeld residuals test for all-cause mortality

**Figure. S3** Schoenfeld residuals test for cancer mortality

**Figure. S4** Schoenfeld residuals test for cardiovascular disease mortality

**Figure. S5** Schoenfeld residuals test for respiratory disease mortality

**Figure. S6** Schoenfeld residuals test for digestive disease mortality

**Figure. S7** Schoenfeld residuals test for overall incident cancer

**Figure. S8** Distribution of the healthy lifestyle scores

**Figure. S9** Multivariable-adjusted population-attributable risk percents (95% CI) for all-cause and cause-specific mortality according to weighted lifestyle scores

**Table S1.** Healthy lifestyle behavior definitions

| Healthy lifestyle behavior                          | Field IDs                                                                                    | Healthy lifestyle data-coding                                                                                                                                                                                                                                                                       |
|-----------------------------------------------------|----------------------------------------------------------------------------------------------|-----------------------------------------------------------------------------------------------------------------------------------------------------------------------------------------------------------------------------------------------------------------------------------------------------|
| Never/quit-smoking                                  | 20116                                                                                        | 0. Never. 1. Previous.                                                                                                                                                                                                                                                                              |
| Alcohol consumption $\leq$ 14/28g/day for women/men | 1568,4407 1578, 4418<br>1588, 4429<br>1598, 4440<br>1608, 4451<br>4462, 5364                 | 125ml red wine $\approx$ 0.85 servings.<br>125ml white wine $\approx$ 0.85 servings.<br>568 ml beer $\approx$ 1.28 servings.<br>25ml spirits $\approx$ 0.57 servings.<br>50ml fortified wine $\approx$ 0.56 servings.<br>125ml alcopops $\approx$ 0.36 servings.<br>* 1 serving was defined as 14g. |
| Good sleep                                          | 1160<br>1210                                                                                 | 7–8<br>2.No                                                                                                                                                                                                                                                                                         |
| Diet behaviors $\geq$ 4 groups                      | 1309, 1319<br>1289, 1299<br>1329, 1339<br>1438, 1448<br>1349<br>1369,1379,1389<br>1458, 1468 | Fruit $\geq$ 3 pieces/day<br>Vegetables $\geq$ 3 tablespoons/day<br>Fish $\geq$ twice a week<br>Whole grains $\geq$ 3 slices/day<br>Processed meat $\leq$ once a week.<br>Unprocessed meat $\geq$ twice a week<br>Refined grains $\leq$ 1 servings/day                                              |
| Sufficient physical activity                        | 884<br>894<br>904<br>914                                                                     | at least 5 days a week<br>$\geq$ 150 minutes moderate activity per week<br>at least once a week<br>$\geq$ 75 minutes moderate activity per week<br>* Meet any of the above or an equivalent combination                                                                                             |
| Social support                                      | 1031<br>2110<br>6141<br>6160                                                                 | 1.Almost daily. 2.2-4 times a week.<br>3. About once a week<br>3. About once a week. 4.2-4 times a week<br>5.Almost daily<br>Had people in household related to<br>Had leisure/social activities<br>* Containing at least 2 of the social connections above.                                        |
| Sedentary behavior $\leq$ 4 hours/day               | 1070<br>1080<br>1090                                                                         | Time spent watching TV<br>Time spent using computer<br>Time spent driving<br>* TV + computer + driving $\leq$ 4 h/day                                                                                                                                                                               |

**Table S2.** Coding of outcomes

| Outcome                              | ICD-10  | ICD-9   | Self-reported                            |
|--------------------------------------|---------|---------|------------------------------------------|
| Cause of death                       |         |         |                                          |
| Cancer                               | C00-C97 |         |                                          |
| CVD                                  | I05-I89 |         |                                          |
| Respiratory disease                  | J09-J99 |         |                                          |
| Digestive disease                    | K20-K93 |         |                                          |
| Over all cancer                      | C00-C97 | 140-208 | (-1) to 9999                             |
| Site-specific cancer                 |         |         |                                          |
| Digestive organs                     | C15-C26 | 150-159 | 1017-1023                                |
| Respiratory and intrathoracic organs | C30-C39 | 160-165 | 1001, 1006-1009,<br>1027-1028, 1080-1084 |
| Breast                               | C50-C50 | 174-175 | 1002                                     |

[Abbreviation: CVD, cardiovascular disease. ICD, International Classification of Disease.]

**Table S3.** Characteristics of MetS participants included or excluded from the current study

| Characteristics              | Over all MetS      | Included          | Excluded          |
|------------------------------|--------------------|-------------------|-------------------|
| No. of participants          | 137591             | 87342             | 50249             |
| Age, years *                 | 60 [52, 60]        | 59 [52,64]        | 60 [54, 65]       |
| Sex                          |                    |                   |                   |
| Female                       | 68700 (49.9)       | 39508 (45.2)      | 29192 (58.1)      |
| Male                         | 68891 (50.1)       | 47834 (54.8)      | 21057 (41.9)      |
| BMI, kg/m <sup>2</sup> *     | 30.5 [27.9,33.6]   | 30.4 [27.8, 33.4] | 30.7 [27.9,34.2]  |
| Ethnicity                    |                    |                   |                   |
| White                        | 127443 (92.6)      | 81039 (92.8)      | 46404 (92.3)      |
| Mixed                        | 1963 (1.4)         | 1219 (1.4)        | 744 (1.5)         |
| Asian                        | 5370 (3.9)         | 3604 (4.1)        | 1766 (3.5)        |
| Black                        | 2371 (1.7)         | 1480 (1.7)        | 891 (1.8)         |
| Missing value                | 444 (0.3)          |                   | 444 (0.3)         |
| Townsend deprivation index * | -1.8 [(-3.5), 1.1] | -1.9 [(-3.5),0.8] | -1.5 [(-3.3),1.7] |
| Employment                   |                    |                   |                   |
| Employed                     | 122798 (89.2)      | 79140 (90.6)      | 43658 (13.1)      |
| Others                       | 14793 (10.8)       | 8202 (9.4)        | 6591 (13.1)       |
| Education                    |                    |                   |                   |
| College/university           | 34897 (25.4)       | 24274 (27.8)      | 10623 (21.1)      |
| Others                       | 102694 (74.6)      | 63068 (72.2)      | 39626 (78.9)      |
| Medication, n (%) +          |                    |                   |                   |
| Anti-cholesterol drug        | 41511 (30.2)       | 25568 (29.3)      | 15943 (31.7)      |
| Antihypertensive drug        | 50198 (36.5)       | 30610 (35.0)      | 19588 (39.0)      |
| Insulin                      | 3902 (2.8)         | 2182 (2.5)        | 1720 (3.4)        |
| Family history +             |                    |                   |                   |
| Hypertension                 | 68271 (49.6)       | 43738 (50.1)      | 24533 (48.8)      |
| DM                           | 38289 (27.8)       | 24132 (27.6)      | 14157 (28.2)      |
| Cancer                       | 48812 (35.5)       | 30636 (35.1)      | 18176 (36.2)      |

{Abbreviations: BMI, body mass index; DM, diabetes mellitus; MetS, metabolic syndrome; +, the binary variable shows the percentage of one of the columns. \*, Continuous variables were presented as median [interquartile range].

Categorical variables were presented as frequencies (%).

Participants with cancers at baseline, lost to follow-up, with age < 40 years, with missing information, who died or had cancer within the first three years after recruitment were excluded. }

**Table S4.** Baseline characteristics of MetS participants by weighted lifestyle scores

| Characteristic     | Weighted lifestyle scores for mortality   |                                             |                                         | Weighted lifestyle scores for overall cancer incidence |                                             |                                         |
|--------------------|-------------------------------------------|---------------------------------------------|-----------------------------------------|--------------------------------------------------------|---------------------------------------------|-----------------------------------------|
|                    | Unfavorable<br>(Quintile 1;<br>n = 17697) | Intermedium<br>(Quintile 2-4;<br>n = 48699) | Favorable<br>(Quintile 5;<br>n = 20946) | Unfavorable<br>(Quintile 1;<br>n = 17779)              | Intermedium<br>(Quintile 2-4;<br>n = 51042) | Favorable<br>(Quintile 5;<br>n = 18521) |
| Age, n (%)         |                                           |                                             |                                         |                                                        |                                             |                                         |
| 40-49 years        | 3811(21.5)                                | 8356(17.2)                                  | 4097(19.6)                              | 4304(24.2)                                             | 9157(17.9)                                  | 2803(15.1)                              |
| 50-59 years        | 6240(35.3)                                | 16134(33.1)                                 | 6646(31.7)                              | 6457(36.3)                                             | 16899(33.1)                                 | 5664(30.6)                              |
| ≥ 60 years         | 7646(43.2)                                | 24209(49.7)                                 | 10203(48.7)                             | 718(39.5)                                              | 24986(49.0)                                 | 10054(54.3)                             |
| Sex, n (%)         |                                           |                                             |                                         |                                                        |                                             |                                         |
| Female             | 6601(37.3)                                | 22153(45.5)                                 | 10754(51.3)                             | 7147(40.2)                                             | 23717(46.5)                                 | 8644(46.7)                              |
| Male               | 11096(62.7)                               | 26546(54.5)                                 | 10192(48.7)                             | 10632(59.8)                                            | 27325(53.5)                                 | 9877(53.3)                              |
| Ethnicity, n (%)   |                                           |                                             |                                         |                                                        |                                             |                                         |
| White              | 16705(94.4)                               | 45317(93.1)                                 | 19017(90.8)                             | 16811(94.6)                                            | 47586(93.2)                                 | 16642(89.9)                             |
| Mixed              | 247(1.4)                                  | 646(1.3)                                    | 326(1.6)                                | 243(1.4)                                               | 622(1.2)                                    | 354(1.4)                                |
| Asian              | 466(2.6)                                  | 1889(3.9)                                   | 1248(6.0)                               | 498(2.8)                                               | 2074(4.1)                                   | 1032(5.6)                               |
| Black              | 279(1.6)                                  | 847(1.7)                                    | 354(1.7)                                | 227(1.3)                                               | 760(1.5)                                    | 493(2.7)                                |
| TDI, n (%)         |                                           |                                             |                                         |                                                        |                                             |                                         |
| 1 (least deprived) | 2845(16.1)                                | 10023(20.6)                                 | 4612(22.0)                              | 3055(17.2)                                             | 10621(20.8)                                 | 3804(20.5)                              |
| 2- 4               | 9986(56.4)                                | 29530(60.6)                                 | 12879(61.5)                             | 10048(56.5)                                            | 31087(60.9)                                 | 11260(60.8)                             |
| 5 (most deprived)  | 4866(27.5)                                | 9146(18.8)                                  | 3455(16.5)                              | 4676(26.3)                                             | 9334(18.3)                                  | 3457(18.7)                              |
| Employment, n (%)  |                                           |                                             |                                         |                                                        |                                             |                                         |
| Employed           | 15161(85.7)                               | 44469(91.3)                                 | 19510(93.1)                             | 15540(87.4)                                            | 46596(91.3)                                 | 17004(91.8)                             |
| Unemployed         | 2536(14.3)                                | 4230(8.7)                                   | 1436(6.9)                               | 2239(12.6)                                             | 4446(8.7)                                   | 1517(8.2)                               |
| Education, n (%)   |                                           |                                             |                                         |                                                        |                                             |                                         |
| College/university | 3963(22.4)                                | 13239(27.2)                                 | 7072(33.8)                              | 4667(26.3)                                             | 24608(28.6)                                 | 4999(27.0)                              |
| Others             | 13734(77.6)                               | 35460(72.8)                                 | 13874(66.2)                             | 13112(73.7)                                            | 36434(71.4)                                 | 13522(73.0)                             |
| BMI, n (%)         |                                           |                                             |                                         |                                                        |                                             |                                         |

|                                       |             |             |             |             |             |             |
|---------------------------------------|-------------|-------------|-------------|-------------|-------------|-------------|
| < 25 kg/m <sup>2</sup>                | 1179(6.7)   | 2987(6.1)   | 1973(9.4)   | 1348(7.6)   | 3529(6.9)   | 1262(6.8)   |
| 25-30 kg/m <sup>2</sup>               | 6778(38.3)  | 18504(38.0) | 8962(42.8)  | 7284(41.0)  | 19772(38.7) | 7187(38.8)  |
| ≥ 30 kg/m <sup>2</sup>                | 9740(27208) | 27208(55.9) | 10011(47.8) | 9147(51.4)  | 27740(54.3) | 10072(54.4) |
| Anti-cholesterol drug, n (%)          |             |             |             |             |             |             |
| No                                    | 12154(68.7) | 34021(69.9) | 15599(74.5) | 12820(72.1) | 36321(71.2) | 12633(68.2) |
| Yes                                   | 5543(31.3)  | 14678(30.1) | 5347(25.5)  | 4959(27.9)  | 14721(28.8) | 5888(31.8)  |
| Antihypertensive drug, n (%)          |             |             |             |             |             |             |
| No                                    | 11475(64.8) | 30978(63.6) | 14279(68.2) | 12099(68.1) | 32988(64.6) | 11645(62.9) |
| Yes                                   | 6222(35.2)  | 17721(36.4) | 6667(31.8)  | 5680(31.9)  | 18054(35.4) | 6876(37.1)  |
| Insulin, n (%)                        |             |             |             |             |             |             |
| No                                    | 17199(97.2) | 47452(97.4) | 20509(97.9) | 17375(97.7) | 49783(97.5) | 18002(97.2) |
| Yes                                   | 498(2.8)    | 1247(2.6)   | 437(2.1)    | 404(2.3)    | 1259(2.5)   | 519(2.8)    |
| Family history of hypertension, n (%) |             |             |             |             |             |             |
| No                                    | 9325(52.7)  | 24061(49.4) | 10218(48.8) | 9235(51.9)  | 25254(49.5) | 9115(49.2)  |
| Yes                                   | 8372(47.3)  | 24638(50.6) | 10728(51.2) | 8544(48.1)  | 25788(50.5) | 9406(50.8)  |
| Family history of DM, n (%)           |             |             |             |             |             |             |
| No                                    | 12959(73.2) | 35211(72.3) | 15040(71.8) | 13176(74.1) | 36880(72.3) | 13154(71.0) |
| Yes                                   | 4738(26.8)  | 13488(27.7) | 5906(28.2)  | 4603(25.9)  | 14162(27.7) | 5367(29.0)  |
| Cancer, n (%)                         |             |             |             |             |             |             |
| No                                    | 11469(64.8) | 31286(64.2) | 13951(66.6) | 11681(65.7) | 33007(64.7) | 12018(64.9) |
| Yes                                   | 6228(35.2)  | 17413(35.8) | 6995(33.4)  | 6098(34.3)  | 18035(35.3) | 6503(35.1)  |
| No. of MeTs components, n (%)         |             |             |             |             |             |             |
| 3                                     | 11391(64.4) | 31557(64.8) | 14248(68.0) | 11816(66.5) | 33547(65.7) | 11833(63.9) |
| 4                                     | 5002(28.3)  | 13673(28.1) | 5408(25.8)  | 4853(27.3)  | 13977(27.4) | 5253(28.4)  |
| 5                                     | 1304(7.4)   | 3469(7.1)   | 1290(6.2)   | 1110(6.2)   | 3518(6.9)   | 1435(7.7)   |

[Abbreviations: TDI, Townsend deprivation index; BMI, body mass index; DM, diabetes mellitus; MetS, metabolic syndrome.]

**Table S5.** Baseline characteristics of MetS participants by unweighted lifestyle scores

|                    | Unweighted lifestyle scores |              |               |               |               |                 |
|--------------------|-----------------------------|--------------|---------------|---------------|---------------|-----------------|
| Characteristic     | 0-1 (n = 2243)              | 2 (n = 7875) | 3 (n = 17408) | 4 (n = 24083) | 5 (n = 21609) | 6-7 (n = 14124) |
| Age, n (%)         |                             |              |               |               |               |                 |
| 40-49 years        | 475(21.2)                   | 1425(18.1)   | 3190(18.3)    | 4325(18.0)    | 4130(19.0)    | 2746(19.4)      |
| 50-59 years        | 813(36.2)                   | 2757(35.0)   | 5921(34.0)    | 7980(33.1)    | 7034(32.6)    | 4515(32.0)      |
| ≥ 60 years         | 955(42.6)                   | 3693(46.9)   | 8297(47.7)    | 11778(48.9)   | 10472(48.5)   | 6863(48.6)      |
| Sex, n (%)         |                             |              |               |               |               |                 |
| Female             | 630(28.1)                   | 2720(34.5)   | 6749(38.8)    | 10560(43.8)   | 10688(49.5)   | 8161(57.8)      |
| Male               | 1613(71.9)                  | 5155(65.5)   | 10659(61.2)   | 13523(56.2)   | 10921(50.5)   | 5963(42.2)      |
| Ethnicity, n (%)   |                             |              |               |               |               |                 |
| White              | 2166(96.6)                  | 7567(96.1)   | 16531(94.9)   | 22398(93.0)   | 19727(91.3)   | 12668(89.7)     |
| Mixed              | 18(0.8)                     | 83(1.1)      | 197(1.1)      | 319(1.3)      | 360(1.7)      | 242(1.7)        |
| Asian              | 28(1.2)                     | 128(1.6)     | 428(2.5)      | 905(3.8)      | 1142(5.3)     | 973(6.9)        |
| Black              | 31(1.4)                     | 97(1.2)      | 270(1.6)      | 461(1.9)      | 380(1.8)      | 241(1.7)        |
| TDI, n (%)         |                             |              |               |               |               |                 |
| 1 (least deprived) | 315(14.0)                   | 1371(17.4)   | 3253(18.7)    | 4965(20.6)    | 4553(21.1)    | 3024(21.4)      |
| 2- 4               | 1245(55.5)                  | 4665(59.2)   | 10336(59.4)   | 14353(59.6)   | 13130(60.8)   | 8666(61.4)      |
| 5 (most deprived)  | 683(30.5)                   | 1839(23.4)   | 3820(21.9)    | 4765(19.8)    | 3926(18.2)    | 2434(17.2)      |
| Employment, n (%)  |                             |              |               |               |               |                 |
| Employed           | 1822(81.2)                  | 6822(86.6)   | 15468(88.9)   | 21983(91.3)   | 19924(92.2)   | 13120(92.9)     |
| Unemployed         | 421(18.8)                   | 1053(13.4)   | 1939(11.1)    | 2100(8.7)     | 1685(7.8)     | 1004(7.1)       |
| Education, n (%)   |                             |              |               |               |               |                 |
| College/university | 400(17.8)                   | 1681(21.3)   | 4029(23.1)    | 6448(26.8)    | 6606(30.6)    | 5110(36.2)      |
| Others             | 1843(82.2)                  | 6194(78.7)   | 13379(76.9)   | 17635(73.2)   | 15003(69.4)   | 9014(63.8)      |
| BMI, n (%)         |                             |              |               |               |               |                 |

|                                       |            |            |             |             |             |             |
|---------------------------------------|------------|------------|-------------|-------------|-------------|-------------|
| < 25 kg/m <sup>2</sup>                | 133(5.9)   | 362(4.6)   | 868(5.0)    | 1527(6.3)   | 1699(7.9)   | 1550(11.0)  |
| 25-30 kg/m <sup>2</sup>               | 784(35.0)  | 2784(35.4) | 6307(36.2)  | 9367(38.9)  | 8801(40.7)  | 6201(43.9)  |
| ≥ 30 kg/m <sup>2</sup>                | 1326(59.1) | 4729(60.1) | 10233(58.8) | 13189(54.8) | 11109(51.4) | 6373(45.1)  |
| Anti-cholesterol drug, n (%)          |            |            |             |             |             |             |
| No                                    | 1495(66.7) | 5190(65.9) | 11796(67.8) | 16872(70.1) | 15734(72.8) | 10687(75.7) |
| Yes                                   | 748(33.3)  | 2685(34.1) | 5612(32.2)  | 7211(29.9)  | 5875(27.2)  | 3437(24.3)  |
| Antihypertensive drug, n (%)          |            |            |             |             |             |             |
| No                                    | 1403(62.6) | 4773(60.6) | 10851(62.3) | 15611(64.8) | 14311(66.2) | 9783(69.3)  |
| Yes                                   | 840(37.4)  | 3102(39.4) | 6557(37.7)  | 8472(35.2)  | 7298(33.8)  | 4341(30.7)  |
| Insulin, n (%)                        |            |            |             |             |             |             |
| No                                    | 2188(97.5) | 7635(97.0) | 16931(97.3) | 23450(97.4) | 21126(97.8) | 13830(97.9) |
| Yes                                   | 55(2.5)    | 240(3.0)   | 477(2.7)    | 633(2.6)    | 483(2.2)    | 294(2.1)    |
| Family history of hypertension, n (%) |            |            |             |             |             |             |
| No                                    | 1207(53.8) | 4080(51.8) | 8857(50.9)  | 12071(50.1) | 10544(48.8) | 6845(48.5)  |
| Yes                                   | 1036(46.2) | 3795(48.2) | 8551(49.1)  | 12012(49.9) | 11065(51.2) | 7279(51.5)  |
| Family history of DM, n (%)           |            |            |             |             |             |             |
| No                                    | 1637(73.0) | 5813(73.8) | 12667(72.8) | 17479(72.6) | 15459(71.5) | 10155(71.9) |
| Yes                                   | 606(27.0)  | 2062(26.2) | 4741(27.2)  | 6604(27.4)  | 6150(28.5)  | 3969(28.1)  |
| Cancer, n (%)                         |            |            |             |             |             |             |
| No                                    | 1401(62.5) | 4951(62.9) | 11102(63.8) | 15652(65.0) | 14120(65.3) | 9480(67.1)  |
| Yes                                   | 842(37.5)  | 2924(37.1) | 6306(36.2)  | 8431(35.0)  | 7489(34.7)  | 4644(32.9)  |
| No. of MeTs components, n (%)         |            |            |             |             |             |             |
| 3                                     | 1451(64.7) | 5071(64.4) | 11114(63.8) | 15570(64.7) | 14321(66.3) | 9669(68.5)  |
| 4                                     | 658(29.3)  | 2167(27.5) | 4982(28.6)  | 6820(28.3)  | 5829(27.0)  | 3627(25.7)  |
| 5                                     | 134(6.0)   | 637(8.1)   | 1312(7.5)   | 1693(7.0)   | 1459(6.8)   | 828(5.9)    |

[Abbreviations: TDI, Townsend deprivation index; BMI, body mass index; DM, diabetes mellitus; MetS, metabolic syndrome.]

**Table S6.** HR (95% CI) for all-cause mortality and overall cancer incidence by individual lifestyle factors

|                         | All-cause mortality | <i>p</i> -value | Overall cancer  | <i>p</i> -value |
|-------------------------|---------------------|-----------------|-----------------|-----------------|
| Never/quit smoking      |                     |                 |                 |                 |
| Model 1                 | 0.47(0.44-0.50)     | <0.001          | 0.82(0.77-0.87) | <0.001          |
| Model 2                 | 0.52(0.49-0.56)     | <0.001          | 0.82(0.77-0.87) | <0.001          |
| Model 3                 | 0.51(0.48-0.54)     | <0.001          | 0.82(0.77-0.87) | <0.001          |
| Moderate drinking       |                     |                 |                 |                 |
| Model 1                 | 0.92(0.87-0.97)     | 0.001           | 0.96(0.92-1.00) | 0.067           |
| Model 2                 | 0.92(0.87-0.97)     | 0.001           | 0.96(0.92-1.00) | 0.060           |
| Model 3                 | 0.89(0.84-0.94)     | <0.001          | 0.96(0.92-1.00) | 0.057           |
| Good sleeping           |                     |                 |                 |                 |
| Model 1                 | 0.80(0.76-0.84)     | <0.001          | 1.01(0.97-1.05) | 0.537           |
| Model 2                 | 0.85(0.81-0.90)     | <0.001          | 1.02(0.98-1.06) | 0.417           |
| Model 3                 | 0.88(0.84-0.93)     | <0.001          | 1.02(0.98-1.06) | 0.310           |
| Healthy diet            |                     |                 |                 |                 |
| Model 1                 | 0.86(0.82-0.90)     | <0.001          | 0.99(0.95-1.03) | 0.471           |
| Model 2                 | 0.89(0.85-0.93)     | <0.001          | 0.99(0.95-1.03) | 0.519           |
| Model 3                 | 0.89(0.85-0.94)     | <0.001          | 0.99(0.95-1.03) | 0.552           |
| Sufficient exercise     |                     |                 |                 |                 |
| Model 1                 | 0.77(0.73-0.81)     | <0.001          | 0.96(0.92-1.00) | 0.054           |
| Model 2                 | 0.80(0.77-0.84)     | <0.001          | 0.96(0.93-1.00) | 0.073           |
| Model 3                 | 0.84(0.80-0.88)     | <0.001          | 0.97(0.93-1.01) | 0.111           |
| Social support well     |                     |                 |                 |                 |
| Model 1                 | 0.93(0.89-0.98)     | 0.004           | 1.00(0.96-1.04) | 0.981           |
| Model 2                 | 0.93(0.89-0.98)     | 0.004           | 1.00(0.96-1.04) | 0.997           |
| Model 3                 | 0.93(0.89-0.98)     | 0.004           | 1.00(0.96-1.04) | 0.966           |
| Less sedentary behavior |                     |                 |                 |                 |
| Model 1                 | 0.90(0.85-0.94)     | <0.001          | 1.02(0.98-1.06) | 0.354           |
| Model 2                 | 0.91(0.86-0.96)     | <0.001          | 1.02(0.98-1.06) | 0.326           |
| Model 3                 | 0.94(0.89-0.99)     | 0.022           | 1.03(0.98-1.07) | 0.241           |

[Model 1: adjusted for age at baseline, sex and ethnicity.

Model 2: Model 1 plus education, employment status and TDI.

Model 3: Model 2 plus BMI; medication treatment history for anti-cholesterol drug, antihypertensive drug, and insulin; family history of hypertension, DM, cancer; and the number of MetS component traits.]

**Table S7.** HR (95% CI) for overall and site-specific cancer by weighted lifestyle categories

| Endpoints                                                             | Lifestyle category (weighted lifestyle scores for cancer) |                                             |                                         |
|-----------------------------------------------------------------------|-----------------------------------------------------------|---------------------------------------------|-----------------------------------------|
|                                                                       | Unfavorable<br>(Quintile 1;<br>n = 17779)                 | Intermedium<br>(Quintile 2-4;<br>n = 51042) | Favorable<br>(Quintile 5;<br>n = 18521) |
| Overall cancer (n = 10802)                                            |                                                           |                                             |                                         |
| No. of cases/person-years                                             | 2272/179151                                               | 6280/516912                                 | 2250/186909                             |
| HR (95% CI)                                                           | 1.00 (ref)                                                | 0.88(0.84-0.92)                             | 0.84(0.79-0.90)                         |
| <i>p</i> -value                                                       |                                                           | <0.001                                      | <0.001                                  |
| <i>p</i> -value for trend                                             | <0.001                                                    |                                             |                                         |
| Malignant neoplasms of digestive organs (n = 1665)                    |                                                           |                                             |                                         |
| No. of cases/person-years                                             | 379/179151                                                | 952/516912                                  | 334/186909                              |
| HR (95% CI)                                                           | 1.00 (ref)                                                | 0.82(0.73-0.93)                             | 0.75(0.65-0.88)                         |
| <i>p</i> -value                                                       |                                                           | 0.001                                       | <0.001                                  |
| <i>p</i> -value for trend                                             | <0.001                                                    |                                             |                                         |
| Malignant neoplasms of respiratory and intrathoracic organs (n = 675) |                                                           |                                             |                                         |
| No. of cases/person-years                                             | 289/179151                                                | 286/516912                                  | 100/186909                              |
| HR (95% CI)                                                           | 1.00 (ref)                                                | 0.33(0.28-0.39)                             | 0.29(0.23-0.37)                         |
| <i>p</i> -value                                                       |                                                           | <0.001                                      | <0.001                                  |
| <i>p</i> -value for trend                                             | <0.001                                                    |                                             |                                         |
| Malignant neoplasm of breast (n = 1099)                               |                                                           |                                             |                                         |
| No. of cases/person-years                                             | 196/179151                                                | 685/516912                                  | 218/186909                              |
| HR (95% CI)                                                           | 1.00 (ref)                                                | 1.01(0.86-1.19)                             | 0.88(0.72-1.07)                         |
| <i>p</i> -value                                                       |                                                           | 0.874                                       | 0.195                                   |
| <i>p</i> -value for trend                                             | 0.184                                                     |                                             |                                         |
| Malignant neoplasm of other and ill-defined sites (n = 7363)          |                                                           |                                             |                                         |
| No. of cases/person-years                                             | 1408/179151                                               | 4357/516912                                 | 1598/186909                             |
| HR (95% CI)                                                           | 1.00 (ref)                                                | 0.99(0.93-1.05)                             | 0.97(0.90-1.04)                         |
| <i>p</i> -value                                                       |                                                           | 0.795                                       | 0.405                                   |
| <i>p</i> -value for trend                                             | 0.663                                                     |                                             |                                         |

[Cox proportional hazards regression adjusted for age at baseline, sex, ethnicity, education, employment status, TDI, BMI categories; medication treatment history for anti-cholesterol drug, antihypertensive drug, and insulin; family history of hypertension, DM, and cancer; and the number of MetS component traits. Unfavorable lifestyle (lowest quintile of weighted healthy lifestyle scores) was considered the reference group.]

|                                   | Unweighted lifestyle scores |                 |                 |                 |                 |                 |
|-----------------------------------|-----------------------------|-----------------|-----------------|-----------------|-----------------|-----------------|
| Endpoints                         | 0-1 (n = 2243)              | 2 (n = 7875)    | 3 (n = 17408)   | 4 (n = 24083)   | 5 (n = 21609)   | 6-7 (n = 14124) |
| All-cause mortality (n = 6739)    |                             |                 |                 |                 |                 |                 |
| No. of cases/person-years         | 325/27290                   | 842/96507       | 1596/213589     | 1854/296327     | 1372/266304     | 750/174611      |
| HR (95% CI)                       | 1.00 (ref)                  | 0.72(0.63-0.82) | 0.64(0.57-0.72) | 0.57(0.50-0.64) | 0.49(0.44-0.56) | 0.45(0.39-0.51) |
| p-value                           |                             | <0.001          | <0.001          | <0.001          | <0.001          | <0.001          |
| p-value for trend                 | <0.001                      |                 |                 |                 |                 |                 |
| Cancer (n = 2712)                 |                             |                 |                 |                 |                 |                 |
| No. of cases/person-years         | 121/27290                   | 326/96507       | 645/213589      | 710/296327      | 570/266304      | 340/174611      |
| HR (95% CI)                       | 1.00 (ref)                  | 0.74(0.60-0.91) | 0.67(0.55-0.82) | 0.55(0.45-0.67) | 0.51(0.42-0.62) | 0.49(0.40-0.61) |
| p-value                           |                             | 0.004           | <0.001          | <0.001          | <0.001          | <0.001          |
| p-value for trend                 | <0.001                      |                 |                 |                 |                 |                 |
| Cardiovascular Disease (n = 1731) |                             |                 |                 |                 |                 |                 |
| No. of cases/person-years         | 81/27290                    | 219/96507       | 430/213589      | 474/296327      | 362/266304      | 165/174611      |
| HR (95% CI)                       | 1.00 (ref)                  | 0.76(0.59-0.98) | 0.72(0.57-0.92) | 0.62(0.49-0.79) | 0.57(0.45-0.73) | 0.45(0.35-0.60) |
| p-value                           |                             | 0.034           | 0.007           | <0.001          | <0.001          | <0.001          |
| p-value for trend                 | <0.001                      |                 |                 |                 |                 |                 |
| Respiratory disease (n = 535)     |                             |                 |                 |                 |                 |                 |
| No. of cases/person-years         | 40/27290                    | 72/96507        | 127/213589      | 171/296327      | 82/266304       | 43/174611       |
| HR (95% CI)                       | 1.00 (ref)                  | 0.52(0.36-0.77) | 0.45(0.32-0.65) | 0.48(0.34-0.68) | 0.28(0.19-0.41) | 0.25(0.16-0.39) |
| p-value                           |                             | 0.004           | <0.001          | <0.001          | <0.001          | <0.001          |
| p-value for trend                 | <0.001                      |                 |                 |                 |                 |                 |
| Digestive disease (n = 321)       |                             |                 |                 |                 |                 |                 |

|                           |            |                 |                 |                 |                 |                 |
|---------------------------|------------|-----------------|-----------------|-----------------|-----------------|-----------------|
| No. of cases/person-years | 24/27290   | 53/96507        | 76/213589       | 91/296327       | 54/266304       | 23/174611       |
| HR (95% CI)               | 1.00 (ref) | 0.63(0.39-1.02) | 0.43(0.27-0.69) | 0.40(0.25-0.63) | 0.28(0.17-0.46) | 0.20(0.11-0.36) |
| <i>p</i> -value           |            | 0.063           | <0.001          | <0.001          | <0.001          | <0.001          |
| <i>p</i> -value for trend | <0.001     |                 |                 |                 |                 |                 |
| Other causes (n = 1440)   |            |                 |                 |                 |                 |                 |
| No. of cases/person-years | 59/27290   | 172/96507       | 318/213589      | 408/296327      | 304/266304      | 179/174611      |
| HR (95% CI)               | 1.00 (ref) | 0.80(0.59-1.07) | 0.69(0.52-0.91) | 0.67(0.51-0.88) | 0.58(0.44-0.77) | 0.56(0.41-0.75) |
| <i>p</i> -value           |            | 0.136           | 0.009           | 0.004           | <0.001          | <0.001          |
| <i>p</i> -value for trend | <0.001     |                 |                 |                 |                 |                 |

[Cox proportional hazards regression adjusted for age at baseline, sex, ethnicity, education, employment status, TDI, BMI categories; medication treatment history for anti-cholesterol drug, antihypertensive drug, and insulin; family history of hypertension, DM, and cancer; and the number of MeTs component traits. 0-1 lifestyle score was considered the reference group.]

**Table S9.** HR (95% CI) for all-cause and cause-specific mortality by weighted lifestyle categories

| Endpoints                                | Lifestyle category (weighted lifestyle scores for mortality) |                                             |                                         |
|------------------------------------------|--------------------------------------------------------------|---------------------------------------------|-----------------------------------------|
|                                          | Unfavorable<br>(Quintile 1;<br>n = 17697)                    | Intermedium<br>(Quintile 2-4;<br>n = 48699) | Favorable<br>(Quintile 5;<br>n = 20946) |
| <b>All-cause mortality (n = 6739)</b>    |                                                              |                                             |                                         |
| No. of cases/person-years                | 1961/216483                                                  | 3587/599653                                 | 1191/258494                             |
| HR (95% CI)                              | 1.00 (ref)                                                   | 0.66(0.63-0.70)                             | 0.57(0.53-0.62)                         |
| <i>p</i> -value                          |                                                              | <0.001                                      | <0.001                                  |
| <i>p</i> -value for trend                | <0.001                                                       |                                             |                                         |
| <b>Cancer (n = 2712)</b>                 |                                                              |                                             |                                         |
| No. of cases/person-years                | 781/216483                                                   | 1408/599653                                 | 523/258494                              |
| HR (95% CI)                              | 1.00 (ref)                                                   | 0.63(0.58-0.69)                             | 0.59(0.53-0.66)                         |
| <i>p</i> -value                          |                                                              | <0.001                                      | <0.001                                  |
| <i>p</i> -value for trend                | <0.001                                                       |                                             |                                         |
| <b>Cardiovascular disease (n = 1731)</b> |                                                              |                                             |                                         |
| No. of cases/person-years                | 521/216483                                                   | 932/599653                                  | 278/258494                              |
| HR (95% CI)                              | 1.00 (ref)                                                   | 0.67(0.60-0.75)                             | 0.54(0.47-0.63)                         |
| <i>p</i> -value                          |                                                              | <0.001                                      | <0.001                                  |
| <i>p</i> -value for trend                | <0.001                                                       |                                             |                                         |
| <b>Respiratory disease (n = 535)</b>     |                                                              |                                             |                                         |
| No. of cases/person-years                | 178/216483                                                   | 287/599653                                  | 70/258494                               |
| HR (95% CI)                              | 1.00 (ref)                                                   | 0.62(0.52-0.76)                             | 0.42(0.31-0.55)                         |
| <i>p</i> -value                          |                                                              | <0.001                                      | <0.001                                  |
| <i>p</i> -value for trend                | <0.001                                                       |                                             |                                         |
| <b>Digestive disease (n = 321)</b>       |                                                              |                                             |                                         |
| No. of cases/person-years                | 115/216483                                                   | 168/599653                                  | 38/258494                               |
| HR (95% CI)                              | 1.00 (ref)                                                   | 0.55(0.43-0.70)                             | 0.33(0.23-0.48)                         |
| <i>p</i> -value                          |                                                              | <0.001                                      | <0.001                                  |
| <i>p</i> -value for trend                | <0.001                                                       |                                             |                                         |
| <b>Other causes (n = 1440)</b>           |                                                              |                                             |                                         |
| No. of cases/person-years                | 366/216483                                                   | 792/599653                                  | 282/258494                              |
| HR (95% CI)                              | 1.00 (ref)                                                   | 0.78(0.69-0.88)                             | 0.72(0.61-0.84)                         |
| <i>p</i> -value                          |                                                              | <0.001                                      | <0.001                                  |
| <i>p</i> -value for trend                | <0.001                                                       |                                             |                                         |

[Cox proportional hazards regression adjusted for age at baseline, sex, ethnicity, education, employment status, TDI, BMI categories; medication treatment history for anti-cholesterol drug, antihypertensive drug, and insulin; family history of hypertension, DM, and cancer; and the number of MetS component traits. Unfavorable lifestyle (lowest quintile of weighted lifestyle scores) was considered the reference group.]

**Table S10.** Crossover analysis of interaction between lifestyle categories (weighted lifestyle scores) and baseline characteristics on all-cause mortality risk

| Subgroup                 | No. of death cases | HR (95% CI)     | <i>p</i> -value | <i>p</i> -trend |
|--------------------------|--------------------|-----------------|-----------------|-----------------|
| <b>Age at baseline</b>   |                    |                 |                 | <0.001          |
| Age 40-49 years          |                    |                 |                 |                 |
| Unfavorable              | 3811(4.4)          | 1.00 (ref)      |                 |                 |
| Intermediate             | 8356(9.6)          | 0.53(0.42-0.67) | <0.001          |                 |
| Favorable                | 4097(4.7)          | 0.53(0.40-0.72) | <0.001          |                 |
| Age 50-59 years          |                    |                 |                 |                 |
| Unfavorable              | 6240(7.1)          | 0.71(0.58-0.87) | 0.001           |                 |
| Intermediate             | 16134(18.5)        | 0.46(0.37-0.56) | <0.001          |                 |
| Favorable                | 6646(7.6)          | 0.39(0.31-0.49) | <0.001          |                 |
| Age ≥60 years            |                    |                 |                 |                 |
| Unfavorable              | 7646(8.8)          | 0.68(0.54-0.87) | 0.002           |                 |
| Intermediate             | 24209(27.7)        | 0.47(0.37-0.59) | <0.001          |                 |
| Favorable                | 10203(11.7)        | 0.40(0.31-0.51) | <0.001          |                 |
| <b>Sex</b>               |                    |                 |                 | <0.001          |
| Male                     |                    |                 |                 |                 |
| Unfavorable              | 11096(12.7)        | 1.00 (ref)      |                 |                 |
| Intermediate             | 26546(30.4)        | 0.72(0.68-0.77) | <0.001          |                 |
| Favorable                | 10192(11.7)        | 0.63(0.58-0.70) | <0.001          |                 |
| Female                   |                    |                 |                 |                 |
| Unfavorable              | 6601(7.6)          | 0.80(0.72-0.88) | <0.001          |                 |
| Intermediate             | 22153(25.4)        | 0.43(0.40-0.47) | <0.001          |                 |
| Favorable                | 10754(12.3)        | 0.37(0.33-0.41) | 0.003           |                 |
| <b>Employment status</b> |                    |                 |                 | <0.001          |
| Unemployed               |                    |                 |                 |                 |
| Unfavorable              | 2536(2.9)          | 1.00 (ref)      |                 |                 |
| Intermediate             | 4230(4.8)          | 0.56(0.49-0.65) | <0.001          |                 |
| Favorable                | 1436(1.6)          | 0.50(0.39-0.63) | <0.001          |                 |
| Employed                 |                    |                 |                 |                 |
| Unfavorable              | 15161(17.4)        | 0.54(0.48-0.61) | <0.001          |                 |
| Intermediate             | 44469(50.9)        | 0.37(0.33-0.42) | <0.001          |                 |
| Favorable                | 19510(22.3)        | 0.32(0.28-0.36) | <0.001          |                 |
| <b>TDI quintile</b>      |                    |                 |                 | <0.001          |
| 5(most deprived)         |                    |                 |                 |                 |
| Unfavorable              | 4866(5.6)          | 1.00 (ref)      |                 |                 |
| Intermediate             | 9146(10.5)         | 0.67(0.61-0.74) | <0.001          |                 |
| Favorable                | 3455(4.0)          | 0.49(0.42-0.57) | <0.001          |                 |
| 2- 4 quintile            |                    |                 |                 |                 |
| Unfavorable              | 9986(11.4)         | 0.69(0.63-0.76) | <0.001          |                 |
| Intermediate             | 29530(33.8)        | 0.46(0.43-0.51) | <0.001          |                 |
| Favorable                | 12879(14.7)        | 0.42(0.38-0.47) | <0.001          |                 |
| 1(least deprived)        |                    |                 |                 |                 |
| Unfavorable              | 2845(3.3)          | 0.66(0.58-0.76) | <0.001          |                 |
| Intermediate             | 10023(11.5)        | 0.42(0.38-0.47) | <0.001          |                 |
| Favorable                | 4612(5.3)          | 0.37(0.32-0.43) | <0.001          |                 |
| <b>BMI categories</b>    |                    |                 |                 | <0.001          |

|                                       |             |                 |        |        |
|---------------------------------------|-------------|-----------------|--------|--------|
| <25 kg/m <sup>2</sup>                 |             |                 |        |        |
| Unfavorable                           | 1179(1.3)   | 1.00 (ref)      |        |        |
| Intermediate                          | 2987(3.4)   | 0.42(0.34-0.52) | <0.001 |        |
| Favorable                             | 1973(2.3)   | 0.29(0.22-0.38) | <0.001 |        |
| <30 kg/m <sup>2</sup>                 |             |                 |        |        |
| Unfavorable                           | 6778(7.8)   | 0.72(0.61-0.85) | <0.001 |        |
| Intermediate                          | 18504(21.2) | 0.45(0.38-0.53) | <0.001 |        |
| Favorable                             | 8962(10.3)  | 0.40(0.33-0.48) | <0.001 |        |
| ≥30 kg/m <sup>2</sup>                 |             |                 |        |        |
| Unfavorable                           | 9740(11.2)  | 0.70(0.60-0.83) | <0.001 |        |
| Intermediate                          | 27208(31.2) | 0.51(0.43-0.60) | <0.001 |        |
| Favorable                             | 10011(11.5) | 0.45(0.38-0.54) | <0.001 |        |
| <b>Family history of hypertension</b> |             |                 |        | <0.001 |
| No                                    |             |                 |        |        |
| Unfavorable                           | 9325(10.7)  | 1.00 (ref)      |        |        |
| Intermediate                          | 24061(27.5) | 0.68(0.63-0.73) | <0.001 |        |
| Favorable                             | 10218(11.7) | 0.57(0.52-0.63) | <0.001 |        |
| Yes                                   |             |                 |        |        |
| Unfavorable                           | 8372(9.6)   | 0.93(0.85-1.02) | 0.143  |        |
| Intermediate                          | 24638(28.2) | 0.60(0.56-0.65) | <0.001 |        |
| Favorable                             | 10728(12.3) | 0.54(0.48-0.59) | <0.001 |        |
| <b>Family history of DM</b>           |             |                 |        | <0.001 |
| No                                    |             |                 |        |        |
| Unfavorable                           | 12959(14.8) | 1.00 (ref)      |        |        |
| Intermediate                          | 35211(40.3) | 0.64(0.60-0.69) | <0.001 |        |
| Favorable                             | 15040(17.2) | 0.56(0.52-0.61) | <0.001 |        |
| Yes                                   |             |                 |        |        |
| Unfavorable                           | 4738(5.4)   | 0.90(0.81-1.00) | 0.053  |        |
| Intermediate                          | 13488(15.4) | 0.66(0.61-0.71) | <0.001 |        |
| Favorable                             | 5906(6.8)   | 0.55(0.49-0.63) | <0.001 |        |
| <b>Family history of Cancer</b>       |             |                 |        | <0.001 |
| No                                    |             |                 |        |        |
| Unfavorable                           | 11469(13.1) | 1.00 (ref)      |        |        |
| Intermediate                          | 31286(35.8) | 0.66(0.61-0.71) | <0.001 |        |
| Favorable                             | 13951(16.0) | 0.58(0.53-0.64) | <0.001 |        |
| Yes                                   |             |                 |        |        |
| Unfavorable                           | 6228(7.1)   | 0.98(0.90-1.08) | 0.721  |        |
| Intermediate                          | 17413(19.9) | 0.66(0.61-0.71) | <0.001 |        |
| Favorable                             | 6995(8.0)   | 0.55(0.49-0.62) | <0.001 |        |

[Abbreviation: TDI, Townsend deprivation index; FH, family history; DM, diabetes mellitus; Unfavorable, lowest quintile of weighted healthy lifestyle scores; Intermediate, quintiles 2-4 of weighted healthy lifestyle scores; Favorable, highest quintile of weighted healthy lifestyle scores. Cox proportional hazards regression adjusted for age at baseline, sex and ethnicity, education, employment status and TDI, BMI; medication treatment history for anti-cholesterol drug, antihypertensive drug, and insulin; family history of hypertension, DM, and cancer; and the number of MeTs component traits (excluded the corresponding variable when stratified by itself).]

**Table S11.** Association of unweighted lifestyle scores category with all-cause and cause-specific mortality risk

| Endpoints                                | Lifestyle category (unweighted lifestyle scores) |                            |                            |
|------------------------------------------|--------------------------------------------------|----------------------------|----------------------------|
|                                          | Scoring 0-2<br>(n = 10118)                       | Scoring 3-5<br>(n = 63100) | Scoring 6-7<br>(n = 14124) |
| <b>All-cause mortality</b> (n = 6739)    |                                                  |                            |                            |
| No. of cases/person-years                | 1167/123797                                      | 4822/776221                | 750/174611                 |
| HR (95% CI)                              | 1.00 (ref)                                       | 0.73(0.68-0.78)            | 0.58(0.53-0.64)            |
| <i>p</i> -value                          |                                                  | <0.001                     | <0.001                     |
| <i>p</i> -value for trend                | <0.001                                           |                            |                            |
| <b>Cancer</b> (n = 2712)                 |                                                  |                            |                            |
| No. of cases/person-years                | 447/123797                                       | 1925/776221                | 340/174611                 |
| HR (95% CI)                              | 1.00 (ref)                                       | 0.72(0.65-0.80)            | 0.63(0.54-0.72)            |
| <i>p</i> -value                          |                                                  | <0.001                     | <0.001                     |
| <i>p</i> -value for trend                | <0.001                                           |                            |                            |
| <b>Cardiovascular disease</b> (n = 1731) |                                                  |                            |                            |
| No. of cases/person-years                | 300/123797                                       | 1266/776221                | 165/174611                 |
| HR (95% CI)                              | 1.00 (ref)                                       | 0.79(0.69-0.90)            | 0.57(0.47-0.69)            |
| <i>p</i> -value                          |                                                  | <0.001                     | <0.001                     |
| <i>p</i> -value for trend                | <0.001                                           |                            |                            |
| <b>Respiratory disease</b> (n = 535)     |                                                  |                            |                            |
| No. of cases/person-years                | 112/123797                                       | 380/776221                 | 43/174611                  |
| HR (95% CI)                              | 1.00 (ref)                                       | 0.65(0.53-0.81)            | 0.40(0.28-0.58)            |
| <i>p</i> -value                          |                                                  | <0.001                     | <0.001                     |
| <i>p</i> -value for trend                | <0.001                                           |                            |                            |
| <b>Digestive disease</b> (n = 321)       |                                                  |                            |                            |
| No. of cases/person-years                | 77/123797                                        | 221/776221                 | 23/174611                  |
| HR (95% CI)                              | 1.00 (ref)                                       | 0.52(0.40-0.68)            | 0.29(0.18-0.46)            |
| <i>p</i> -value                          |                                                  | <0.001                     | <0.001                     |
| <i>p</i> -value for trend                | <0.001                                           |                            |                            |
| <b>Other causes</b> (n = 1440)           |                                                  |                            |                            |
| No. of cases/person-years                | 231/123797                                       | 1030/776221                | 179/174611                 |
| HR (95% CI)                              | 1.00 (ref)                                       | 0.77(0.67-0.89)            | 0.67(0.55-0.82)            |
| <i>p</i> -value                          |                                                  | <0.001                     | <0.001                     |
| <i>p</i> -value for trend                | <0.001                                           |                            |                            |

[Cox proportional hazards regression adjusted for age at baseline, sex, ethnicity, education, employment status, TDI, BMI categories; medication treatment history for anti-cholesterol drug, antihypertensive drug, and insulin; family history of hypertension, DM, and cancer; and the number of MetS component

traits. 0-1 lifestyle score was considered the reference group.]

**Table S12.** Association of unweighted lifestyle scores category with overall and site-specific cancer risk

| Endpoints                                                             | Lifestyle category (unweighted lifestyle scores) |                            |                            |
|-----------------------------------------------------------------------|--------------------------------------------------|----------------------------|----------------------------|
|                                                                       | Scoring 0-2<br>(n = 10118)                       | Scoring 3-5<br>(n = 63100) | Scoring 6-7<br>(n = 14124) |
| Overall cancer (n = 10802)                                            |                                                  |                            |                            |
| No. of cases/person-years                                             | 1370/101669                                      | 7784/638033                | 1648/143271                |
| HR (95% CI)                                                           | 1.00 (ref)                                       | 0.93(0.87-0.98)            | 0.93(0.87-1.01)            |
| <i>p</i> -value                                                       |                                                  | 0.010                      | 0.070                      |
| <i>p</i> -value for trend                                             | 0.035                                            |                            |                            |
| Malignant neoplasms of digestive organs (n = 1665)                    |                                                  |                            |                            |
| No. of cases/person-years                                             | 242/101669                                       | 1212/638033                | 211/143271                 |
| HR (95% CI)                                                           | 1.00 (ref)                                       | 0.86(0.75-0.99)            | 0.78(0.64-0.94)            |
| <i>p</i> -value                                                       |                                                  | 0.039                      | 0.009                      |
| <i>p</i> -value for trend                                             | 0.028                                            |                            |                            |
| Malignant neoplasms of respiratory and intrathoracic organs (n = 675) |                                                  |                            |                            |
| No. of cases/person-years                                             | 158/101669                                       | 457/638033                 | 60/143271                  |
| HR (95% CI)                                                           | 1.00 (ref)                                       | 0.49(0.41-0.59)            | 0.31(0.23-0.42)            |
| <i>p</i> -value                                                       |                                                  | <0.001                     | <0.001                     |
| <i>p</i> -value for trend                                             | <0.001                                           |                            |                            |
| Malignant neoplasm of breast (n = 1099)                               |                                                  |                            |                            |
| No. of cases/person-years                                             | 115/101669                                       | 758/638033                 | 226/143271                 |
| HR (95% CI)                                                           | 1.00 (ref)                                       | 0.78(0.64-0.95)            | 0.80(0.64-1.01)            |
| <i>p</i> -value                                                       |                                                  | 0.014                      | 0.060                      |
| <i>p</i> -value for trend                                             | 0.048                                            |                            |                            |

[Cox proportional hazards regression adjusted for age at baseline, sex, ethnicity, education, employment status, TDI, BMI categories; medication treatment history for anti-cholesterol drug, antihypertensive drug, and insulin; family history of hypertension, DM, and cancer; and the number of MetS component traits. 0-1 lifestyle score was considered the reference group.].

**Table S13.** HR (95% CI) of all-cause and cause-specific mortality risk according to unweighted lifestyle category with further inclusion of BMI

| Endpoints                                | Lifestyle category (unweighted lifestyle scores) |                             |                             |
|------------------------------------------|--------------------------------------------------|-----------------------------|-----------------------------|
|                                          | Scoring 0-2;<br>(n = 9758)                       | Scoring 3-5;<br>(n = 61763) | Scoring 6-8;<br>(n = 15821) |
| <b>All-cause mortality</b> (n = 6739)    |                                                  |                             |                             |
| No. of cases/person-                     | 1125/119437                                      | 4783/759686                 | 831/195507                  |
| HR (95% CI)                              | 1.00 (ref)                                       | 0.73(0.69-0.78)             | 0.56(0.51-0.62)             |
| <i>p</i> -value                          |                                                  | <0.001                      | <0.001                      |
| <i>p</i> -value for trend                | <0.001                                           |                             |                             |
| <b>Cancer</b> (n = 2712)                 |                                                  |                             |                             |
| No. of cases/person-                     | 431/119437                                       | 1911/759686                 | 370/195507                  |
| HR (95% CI)                              | 1.00 (ref)                                       | 0.73(0.66-0.81)             | 0.60(0.52-0.70)             |
| <i>p</i> -value                          |                                                  | <0.001                      | <0.001                      |
| <i>p</i> -value for trend                | <0.001                                           |                             |                             |
| <b>Cardiovascular disease</b> (n = 1731) |                                                  |                             |                             |
| No. of cases/person-                     | 289/119437                                       | 1258/759686                 | 184/195507                  |
| HR (95% CI)                              | 1.00 (ref)                                       | 0.78(0.68-0.89)             | 0.55(0.45-0.67)             |
| <i>p</i> -value                          |                                                  | <0.001                      | <0.001                      |
| <i>p</i> -value for trend                | <0.001                                           |                             |                             |
| <b>Respiratory disease</b> (n = 535)     |                                                  |                             |                             |
| No. of cases/person-                     | 105/119437                                       | 379/759686                  | 51/195507                   |
| HR (95% CI)                              | 1.00 (ref)                                       | 0.67(0.54-0.84)             | 0.39(0.27-0.56)             |
| <i>p</i> -value                          |                                                  | <0.001                      | <0.001                      |
| <i>p</i> -value for trend                | <0.001                                           |                             |                             |
| <b>Digestive disease</b> (n = 321)       |                                                  |                             |                             |
| No. of cases/person-                     | 74/119437                                        | 221/759686                  | 26/195507                   |
| HR (95% CI)                              | 1.00 (ref)                                       | 0.53(0.41-0.69)             | 0.27(0.17-0.44)             |
| <i>p</i> -value                          |                                                  | <0.001                      | <0.001                      |
| <i>p</i> -value for trend                | <0.001                                           |                             |                             |
| <b>Other causes</b> (n = 1440)           |                                                  |                             |                             |
| No. of cases/person-                     | 226/119437                                       | 1014/759686                 | 200/195507                  |
| HR (95% CI)                              | 1.00 (ref)                                       | 0.76(0.65-0.88)             | 0.65(0.53-0.79)             |
| <i>p</i> -value                          |                                                  | <0.001                      | <0.001                      |
| <i>p</i> -value for trend                | <0.001                                           |                             |                             |

[Cox proportional hazards regression adjusted for age at baseline, sex, ethnicity, education, employment status, TDI, medication treatment history for anti-cholesterol drug, antihypertensive drug, and insulin; family history of hypertension, DM, and cancer; and the number of MetS component traits. 0-2 lifestyle score was considered the reference group.  $18.5 \leq \text{BMI} < 25$  defined as healthy level].

**Table S14.** HR (95% CI) of overall and site-specific cancer risk according to unweighted lifestyle category with further inclusion of BMI

| Endpoints                                                                    | Lifestyle category (unweighted lifestyle scores) |                             |                             |
|------------------------------------------------------------------------------|--------------------------------------------------|-----------------------------|-----------------------------|
|                                                                              | Scoring 0-2;<br>(n = 9758)                       | Scoring 3-5;<br>(n = 61763) | Scoring 6-8;<br>(n = 15821) |
| <b>Overall cancer (n = 10802)</b>                                            |                                                  |                             |                             |
| No. of cases/person-years                                                    | 1325/98063                                       | 7646/624416                 | 1831/160493                 |
| HR (95% CI)                                                                  | 1.00 (ref)                                       | 0.93(0.87-0.98)             | 0.92(0.86-0.99)             |
| <i>p</i> -value                                                              |                                                  | 0.011                       | 0.035                       |
| <i>p</i> -value for trend                                                    | 0.035                                            |                             |                             |
| <b>Malignant neoplasms of digestive organs (n = 1665)</b>                    |                                                  |                             |                             |
| No. of cases/person-years                                                    | 234/98063                                        | 1205/624416                 | 226/160493                  |
| HR (95% CI)                                                                  | 1.00 (ref)                                       | 0.88(0.76-1.01)             | 0.75(0.62-0.91)             |
| <i>p</i> -value                                                              |                                                  | 0.064                       | 0.003                       |
| <i>p</i> -value for trend                                                    | 0.014                                            |                             |                             |
| <b>Malignant neoplasms of respiratory and intrathoracic organs (n = 675)</b> |                                                  |                             |                             |
| No. of cases/person-years                                                    | 153/98063                                        | 454/624416                  | 68/160493                   |
| HR (95% CI)                                                                  | 1.00 (ref)                                       | 0.48(0.40-0.58)             | 0.28(0.21-0.38)             |
| <i>p</i> -value                                                              |                                                  | <0.001                      | <0.001                      |
| <i>p</i> -value for trend                                                    | <0.001                                           |                             |                             |
| <b>Malignant neoplasm of breast (n = 1099)</b>                               |                                                  |                             |                             |
| No. of cases/person-years                                                    | 110/98063                                        | 740/624416                  | 249/160493                  |
| HR (95% CI)                                                                  | 1.00 (ref)                                       | 0.78(0.64-0.96)             | 0.81(0.64-1.01)             |
| <i>p</i> -value                                                              |                                                  | 0.018                       | 0.064                       |
| <i>p</i> -value for trend                                                    | 0.060                                            |                             |                             |

[Cox proportional hazards regression adjusted for age at baseline, sex, ethnicity, education, employment status, TDI, medication treatment for cholesterol, hypertension, and DM; medication treatment history for anti-cholesterol drug, antihypertensive drug, and insulin; and the number of MetS component traits. 0-2 lifestyle score was considered the reference group.  $18.5 \leq \text{BMI} < 25$  defined as healthy level].

**Table S15.** HR (95% CI) of all-cause and cause-specific mortality risk according to unweighted lifestyle category with further redefining never smoke as a healthy behavior

| Endpoints                                | Lifestyle category (unweighted lifestyle scores) |                             |                             |
|------------------------------------------|--------------------------------------------------|-----------------------------|-----------------------------|
|                                          | Scoring 0-2;<br>(n = 17455)                      | Scoring 3-5;<br>(n = 59809) | Scoring 6-7;<br>(n = 10078) |
| <b>All-cause mortality</b> (n = 6739)    |                                                  |                             |                             |
| No. of cases/person-                     | 1970/213287                                      | 4326/736497                 | 443/124846                  |
| HR (95% CI)                              | 1.00 (ref)                                       | 0.76(0.72-0.80)             | 0.55(0.49-0.61)             |
| <i>p</i> -value                          |                                                  | <0.001                      | <0.001                      |
| <i>p</i> -value for trend                | <0.001                                           |                             |                             |
| <b>Cancer</b> (n = 2712)                 |                                                  |                             |                             |
| No. of cases/person-                     | 747/213287                                       | 1762/736497                 | 203/124846                  |
| HR (95% CI)                              | 1.00 (ref)                                       | 0.78(0.71-0.85)             | 0.61(0.52-0.71)             |
| <i>p</i> -value                          |                                                  | <0.001                      | <0.001                      |
| <i>p</i> -value for trend                | <0.001                                           |                             |                             |
| <b>Cardiovascular disease</b> (n = 1731) |                                                  |                             |                             |
| No. of cases/person-                     | 512/213287                                       | 1115/736497                 | 104/124846                  |
| HR (95% CI)                              | 1.00 (ref)                                       | 0.81(0.73-0.90)             | 0.58(0.46-0.71)             |
| <i>p</i> -value                          |                                                  | <0.001                      | <0.001                      |
| <i>p</i> -value for trend                | <0.001                                           |                             |                             |
| <b>Respiratory disease</b> (n = 535)     |                                                  |                             |                             |
| No. of cases/person-<br>years            | 189/213287                                       | 330/736497                  | 16/124846                   |
| HR (95% CI)                              | 1.00 (ref)                                       | 0.66(0.55-0.80)             | 0.24(0.14-0.40)             |
| <i>p</i> -value                          |                                                  | <0.001                      | <0.001                      |
| <i>p</i> -value for trend                | <0.001                                           |                             |                             |
| <b>Digestive disease</b> (n = 321)       |                                                  |                             |                             |
| No. of cases/person-                     | 118/213287                                       | 190/736497                  | 13/124846                   |
| HR (95% CI)                              | 1.00 (ref)                                       | 0.57(0.45-0.72)             | 0.28(0.16-0.50)             |
| <i>p</i> -value                          |                                                  | <0.001                      | <0.001                      |
| <i>p</i> -value for trend                | <0.001                                           |                             |                             |
| <b>Other causes</b> (n = 1440)           |                                                  |                             |                             |
| No. of cases/person-                     | 404/213287                                       | 929/736497                  | 107/124846                  |
| HR (95% CI)                              | 1.00 (ref)                                       | 0.77(0.69-0.87)             | 0.60(0.49-0.75)             |
| <i>p</i> -value                          |                                                  | <0.001                      | <0.001                      |
| <i>p</i> -value for trend                | <0.001                                           |                             |                             |

[Cox proportional hazards regression adjusted for age at baseline, sex, ethnicity, education, employment status, TDI, BMI categories; medication treatment history for anti-cholesterol drug, antihypertensive drug, and insulin; family history of hypertension, DM, and cancer; and the number of MetS component traits. 0-1 lifestyle score was considered the reference group.]

**Table S16.** HR (95% CI) of overall and site-specific cancer risk according to unweighted lifestyle category with further redefining never smoke as a healthy behavior

| Endpoints                                                             | Lifestyle category (unweighted lifestyle scores) |                             |                             |
|-----------------------------------------------------------------------|--------------------------------------------------|-----------------------------|-----------------------------|
|                                                                       | Scoring 0-2;<br>(n = 17455)                      | Scoring 3-5;<br>(n = 59809) | Scoring 6-7;<br>(n = 10078) |
| Overall cancer (n = 10802)                                            |                                                  |                             |                             |
| No. of cases/person-years                                             | 2433/175212                                      | 7285/605122                 | 1084/102639                 |
| HR (95% CI)                                                           | 1.00 (ref)                                       | 0.95(0.91-0.99)             | 0.93(0.86-0.99)             |
| <i>p</i> -value                                                       |                                                  | 0.039                       | 0.038                       |
| <i>p</i> -value for trend                                             | 0.057                                            |                             |                             |
| Malignant neoplasms of digestive organs (n = 1665)                    |                                                  |                             |                             |
| No. of cases/person-years                                             | 424/175212                                       | 1117/605122                 | 124/102639                  |
| HR (95% CI)                                                           | 1.00 (ref)                                       | 0.89(0.80-1.00)             | 0.71(0.57-0.87)             |
| <i>p</i> -value                                                       |                                                  | 0.054                       | 0.001                       |
| <i>p</i> -value for trend                                             | 0.003                                            |                             |                             |
| Malignant neoplasms of respiratory and intrathoracic organs (n = 675) |                                                  |                             |                             |
| No. of cases/person-years                                             | 238/175212                                       | 410/605122                  | 27/102639                   |
| HR (95% CI)                                                           | 1.00 (ref)                                       | 0.56(0.48-0.67)             | 0.24(0.16-0.36)             |
| <i>p</i> -value                                                       |                                                  | <0.001                      | <0.001                      |
| <i>p</i> -value for trend                                             | <0.001                                           |                             |                             |
| Malignant neoplasm of breast (n = 1099)                               |                                                  |                             |                             |
| No. of cases/person-years                                             | 181/175212                                       | 756/605122                  | 162/102639                  |
| HR (95% CI)                                                           | 1.00 (ref)                                       | 0.88(0.75-1.04)             | 0.86(0.69-1.07)             |
| <i>p</i> -value                                                       |                                                  | 0.136                       | 0.176                       |
| <i>p</i> -value for trend                                             | 0.284                                            |                             |                             |

[Cox proportional hazards regression adjusted for age at baseline, sex, ethnicity, education, employment status, TDI, BMI categories; medication treatment history for anti-cholesterol drug, antihypertensive drug, and insulin; family history of hypertension, DM, and cancer; and the number of MetS component traits. 0-1 lifestyle score was considered the reference group.]

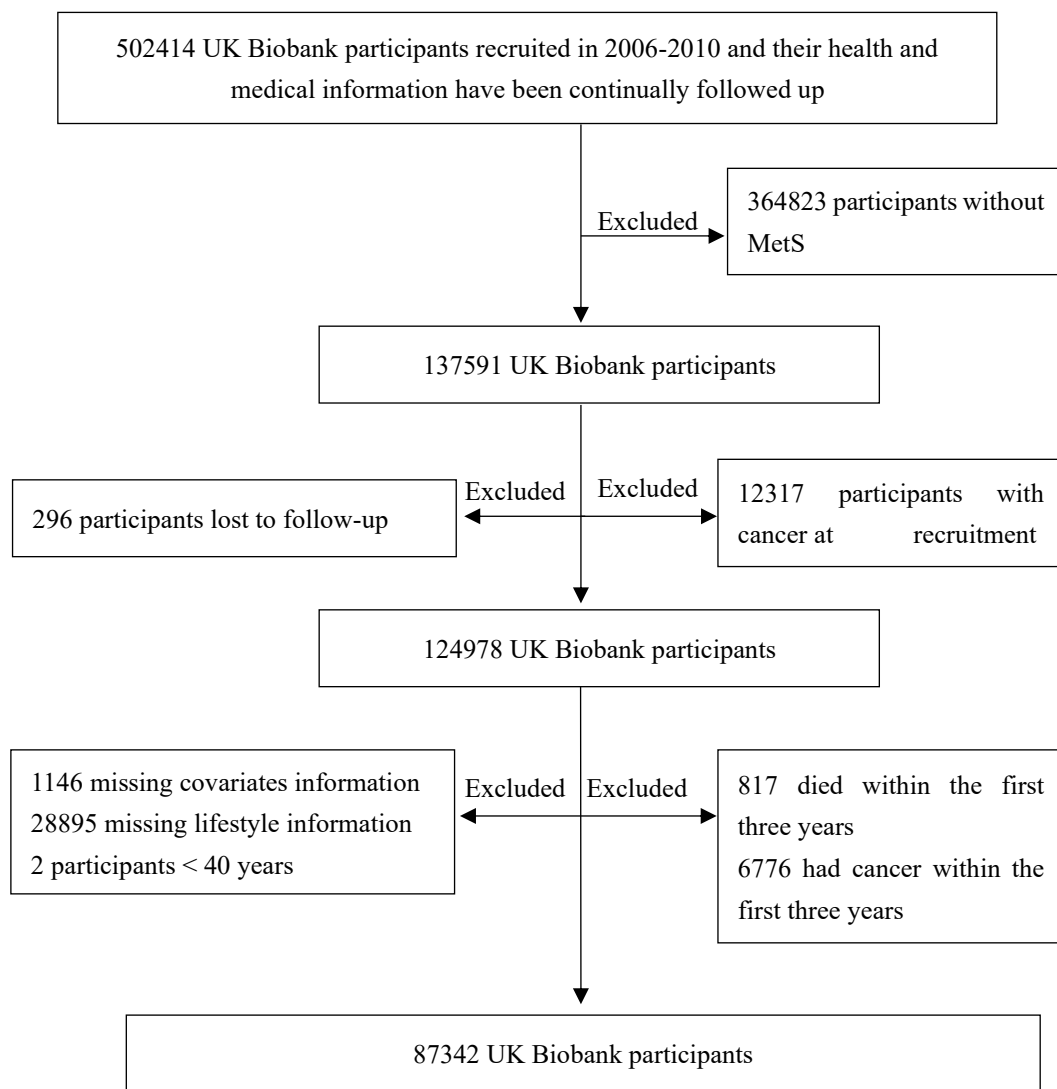

**Figure. S1** Cohort exclusions of the study participants

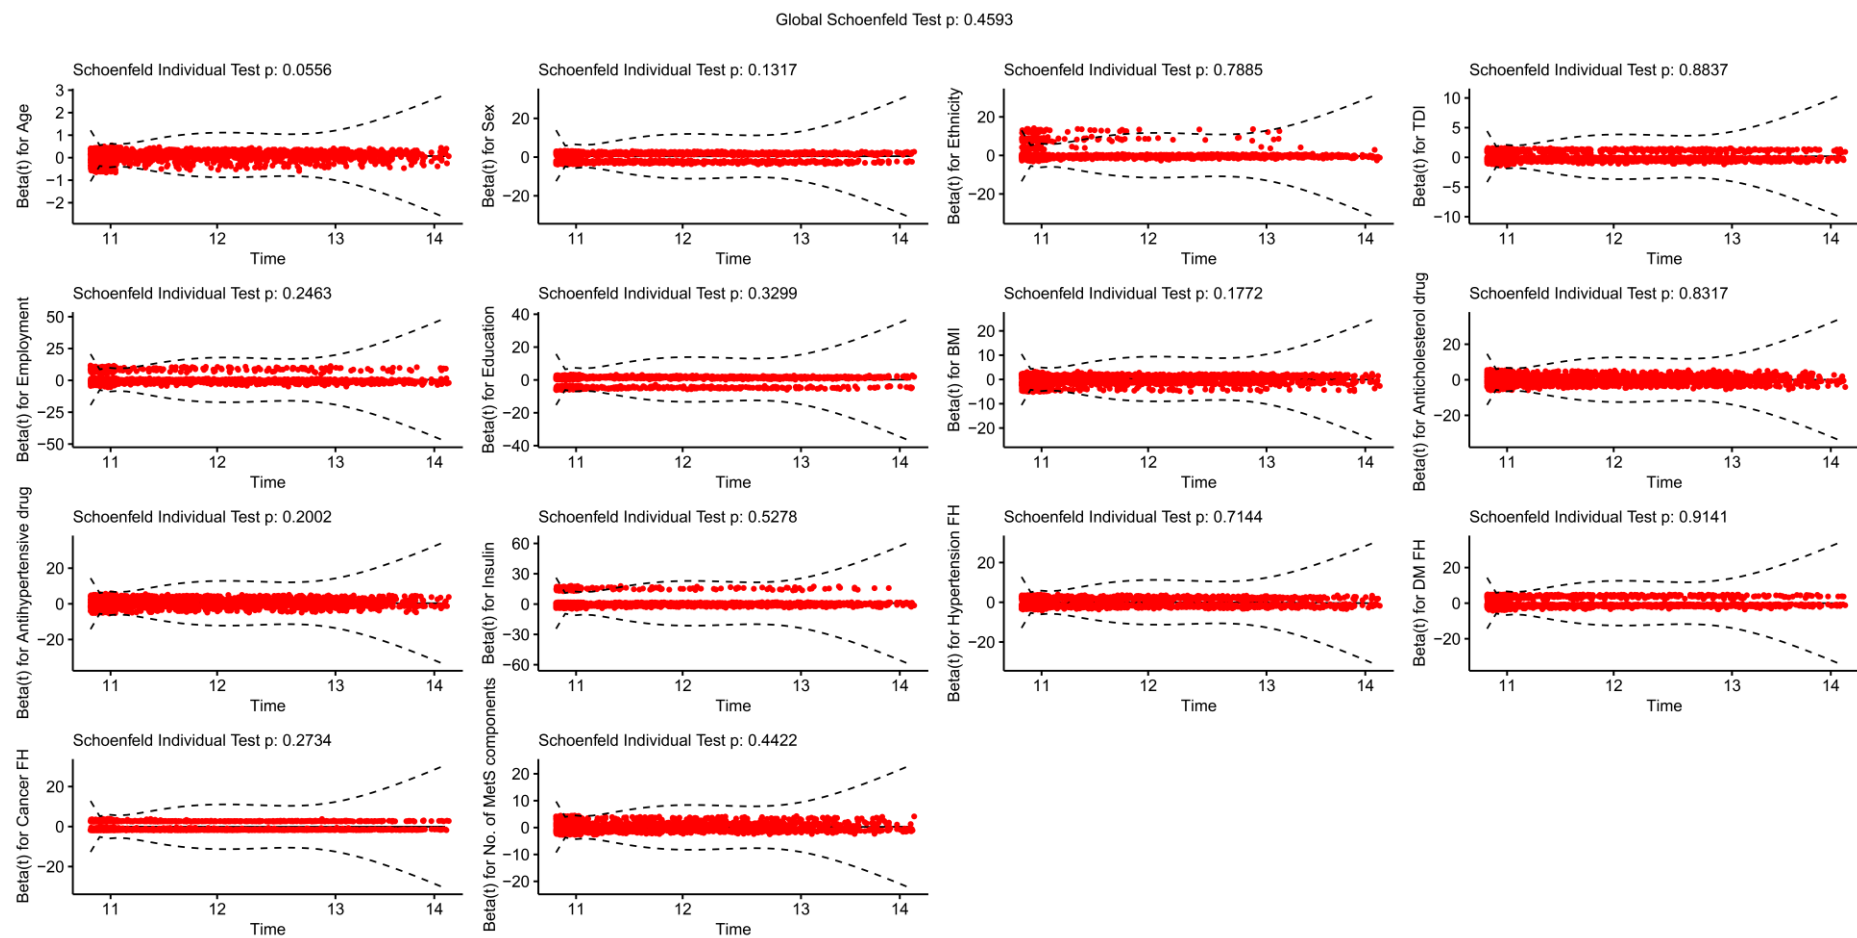

**Figure. S2** Schoenfeld residuals test for all-cause mortality

Abbreviations: TDI, Townsend deprivation index; BMI, body mass index; FH, family history; DM, diabetes mellitus; MetS, metabolic syndrome.

The unit of time is years.

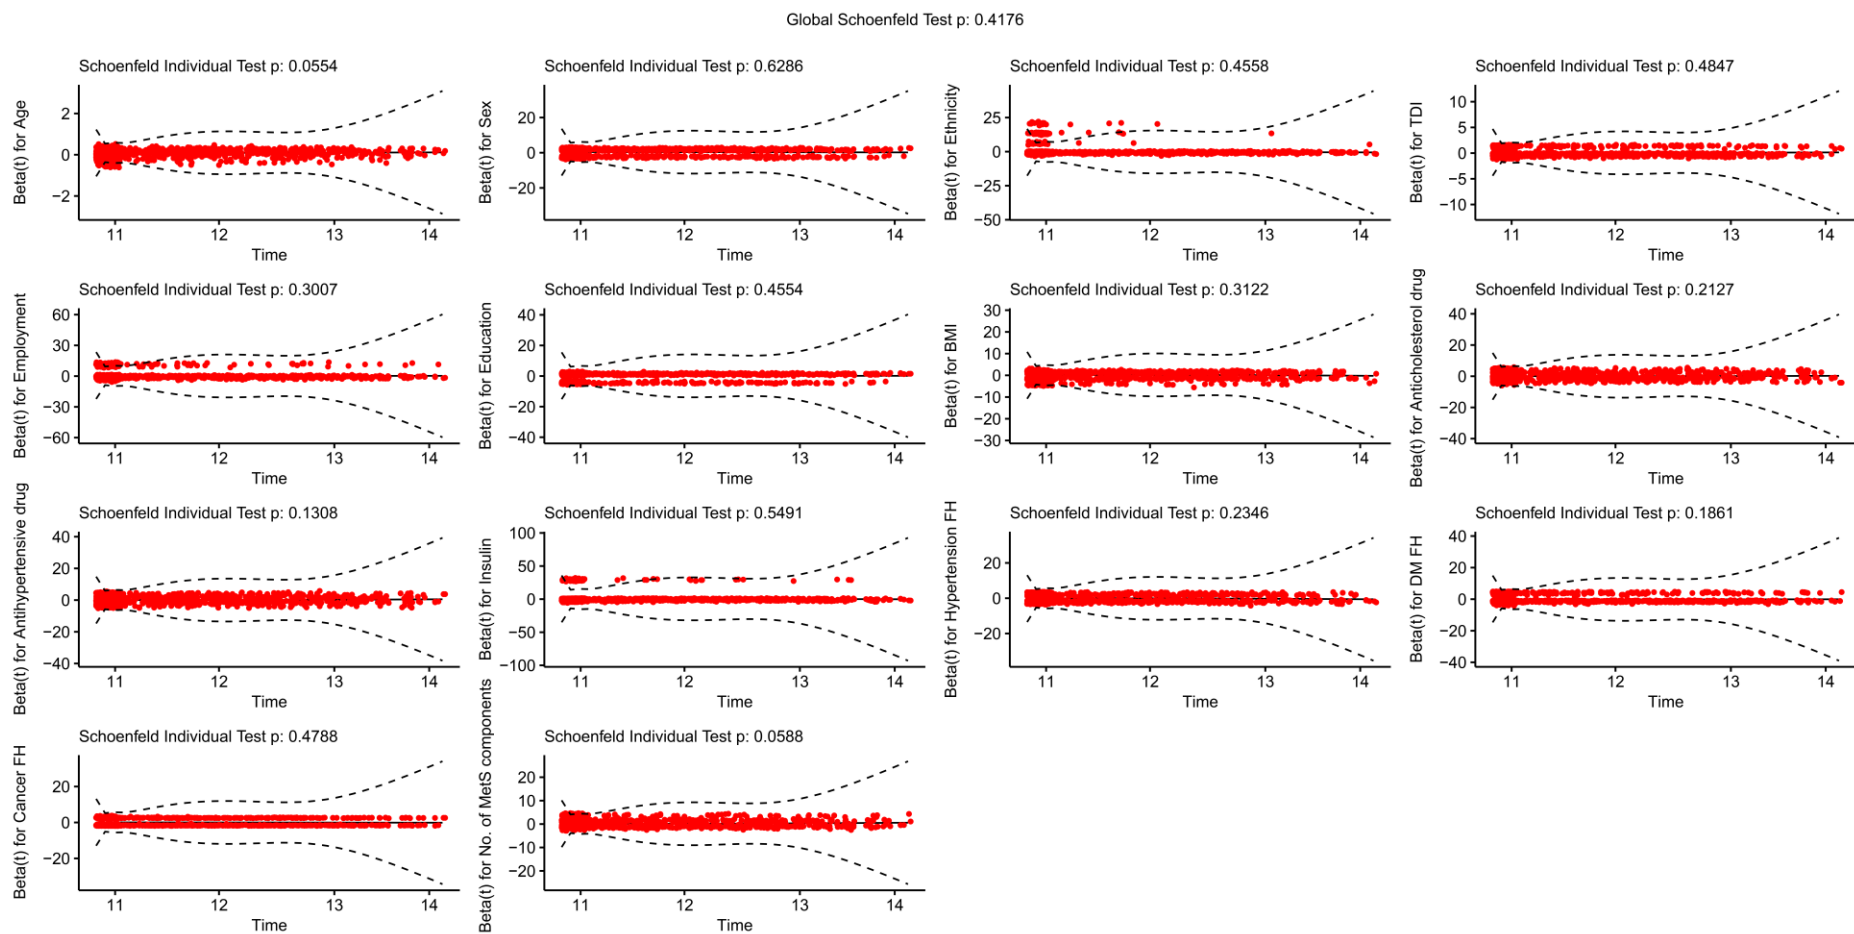

**Figure. S3** Schoenfeld residuals test for cancer mortality

Abbreviations: TDI, Townsend deprivation index; BMI, body mass index; FH, family history; DM, diabetes mellitus; MetS, metabolic syndrome.

The unit of time is years.

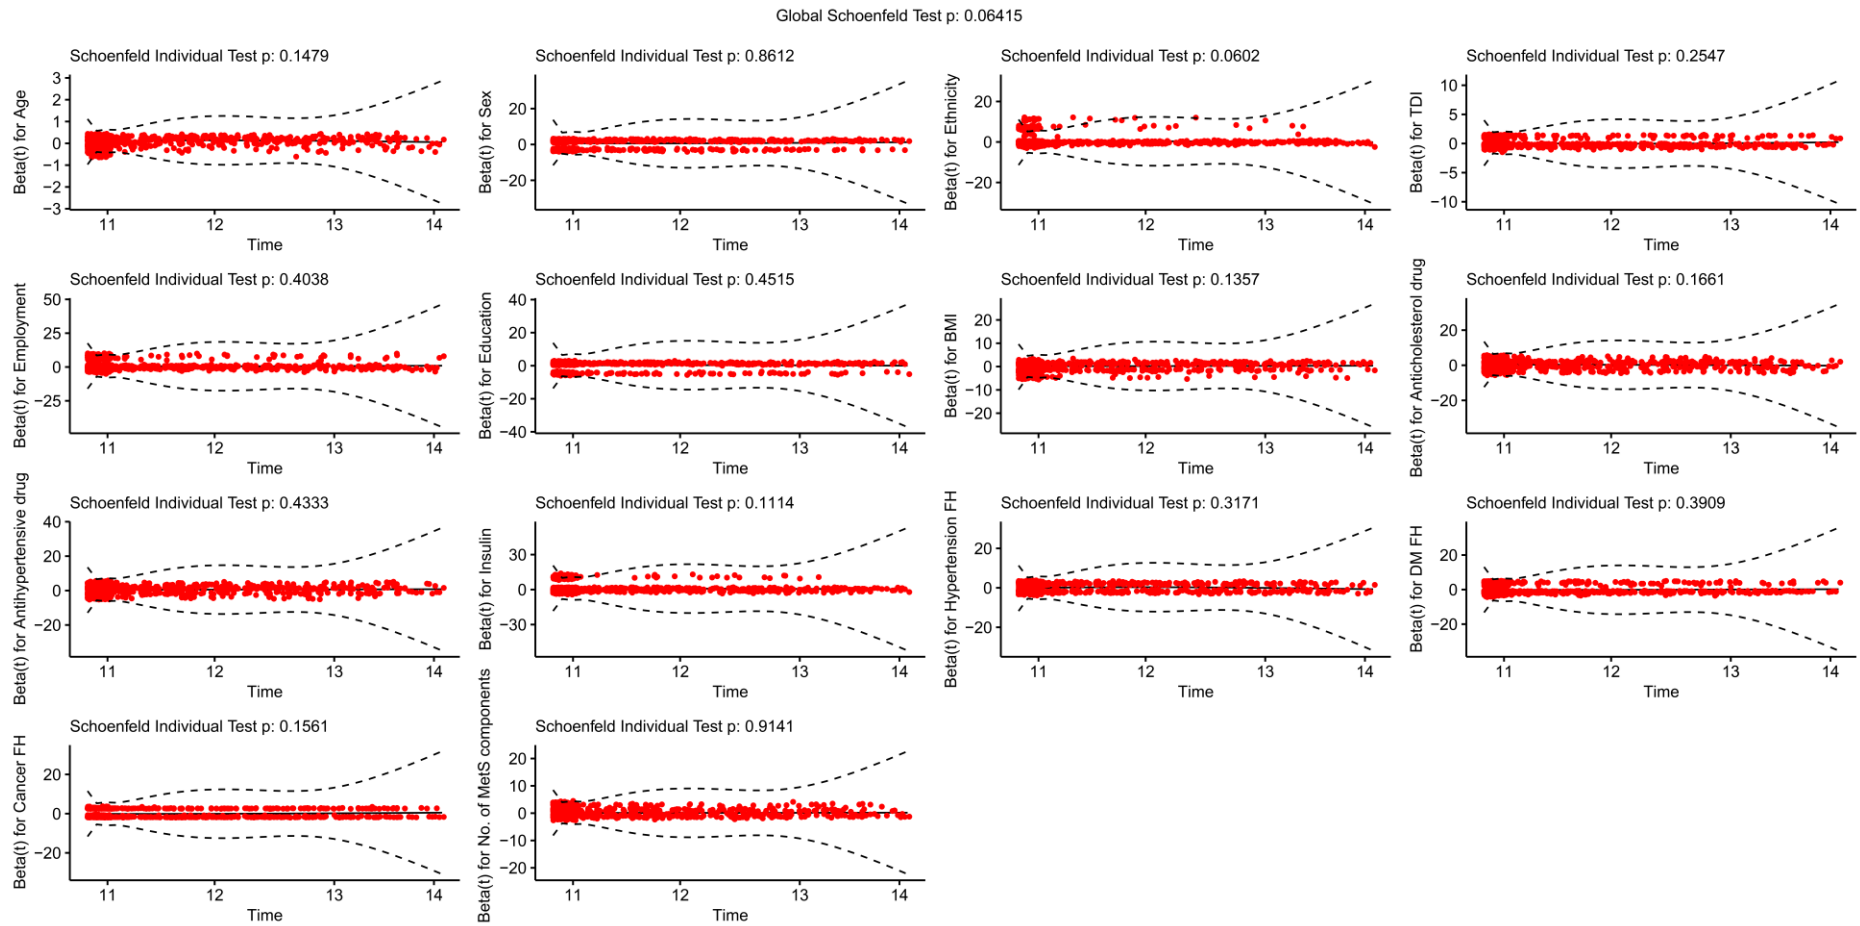

**Figure. S4** Schoenfeld residuals test for cardiovascular disease mortality

Abbreviations: TDI, Townsend deprivation index; BMI, body mass index; FH, family history; DM, diabetes mellitus; MetS, metabolic syndrome.

The unit of time is years.

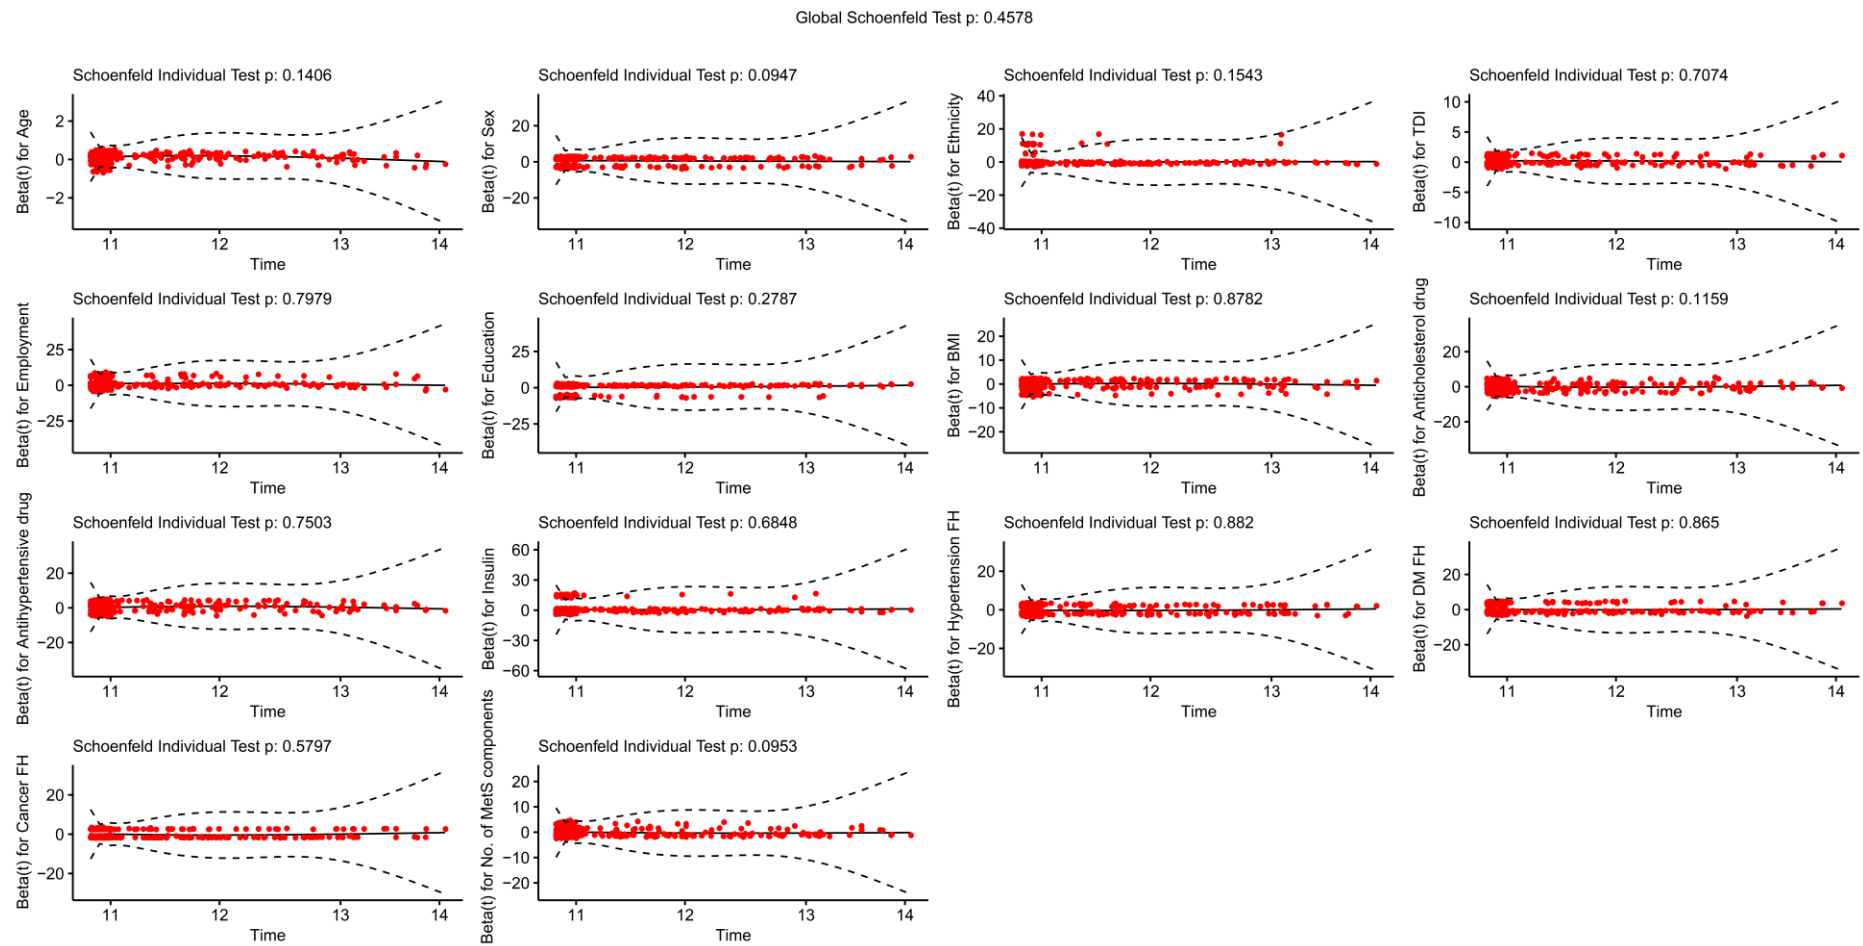

**Figure. S5** Schoenfeld residuals test for respiratory disease mortality

Abbreviations: TDI, Townsend deprivation index; BMI, body mass index; FH, family history; DM, diabetes mellitus; MetS, metabolic syndrome.

The unit of time is years.

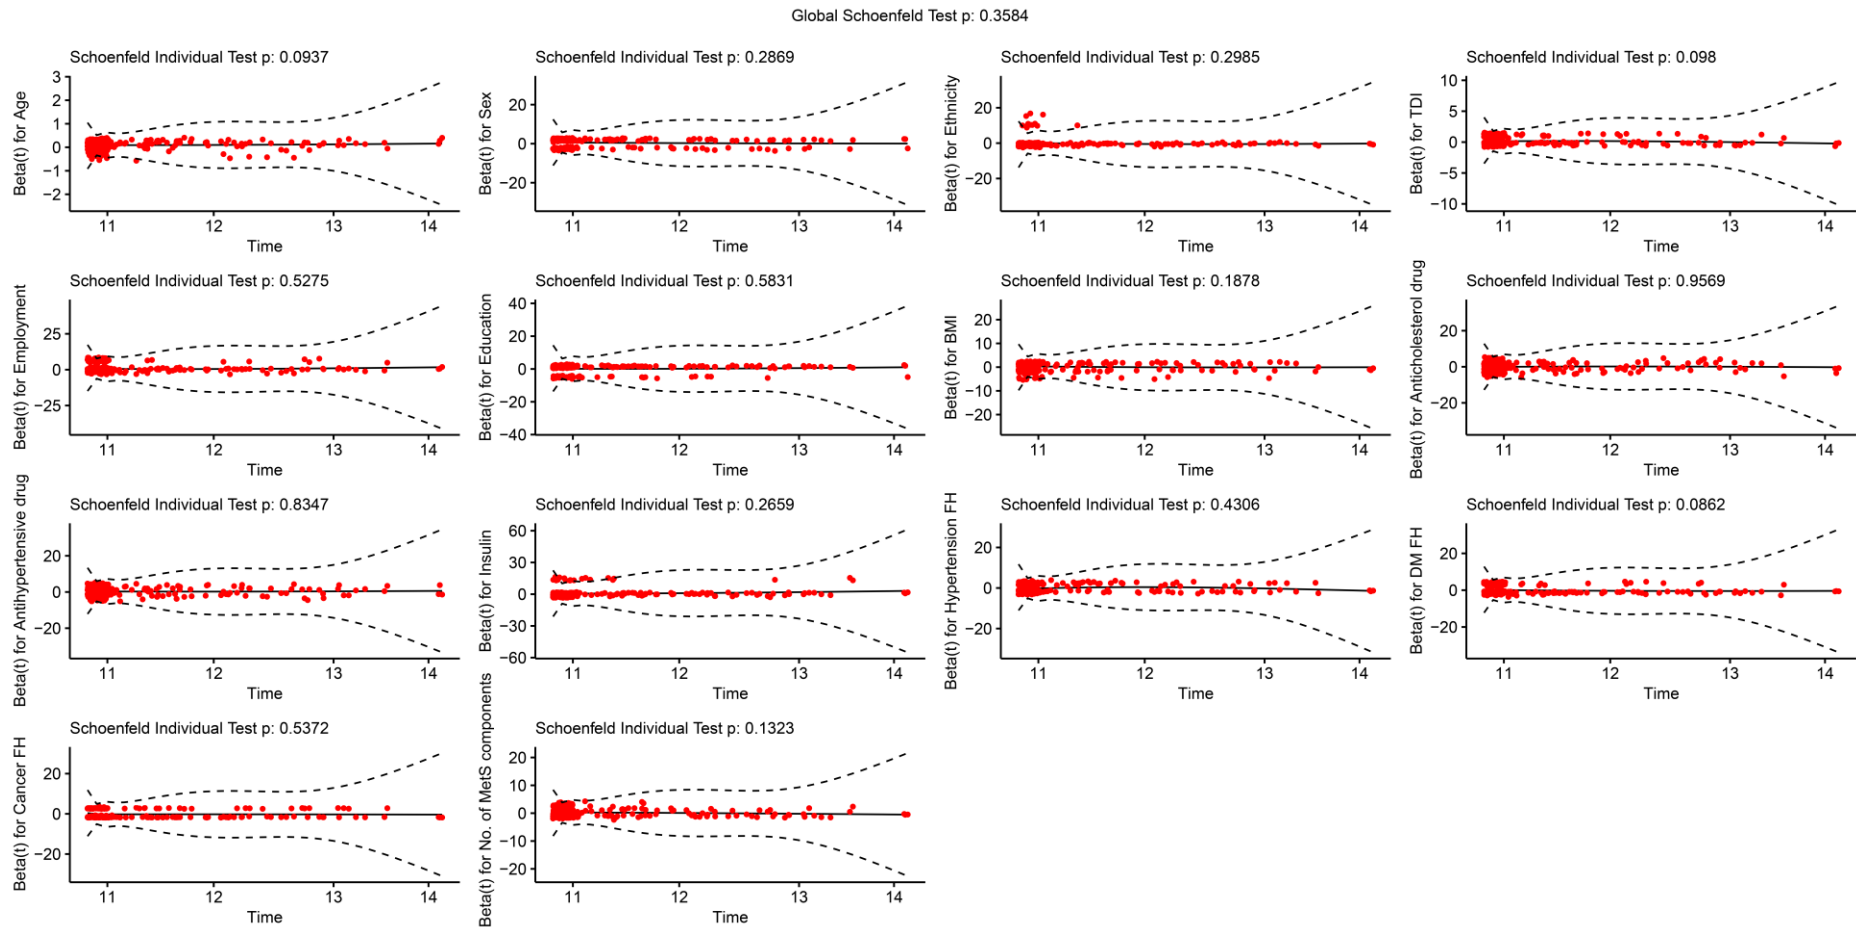

**Figure. S6** Schoenfeld residuals test for digestive disease mortality

Abbreviations: TDI, Townsend deprivation index; BMI, body mass index; FH, family history; DM, diabetes mellitus; MetS, metabolic syndrome.

The unit of time is years.

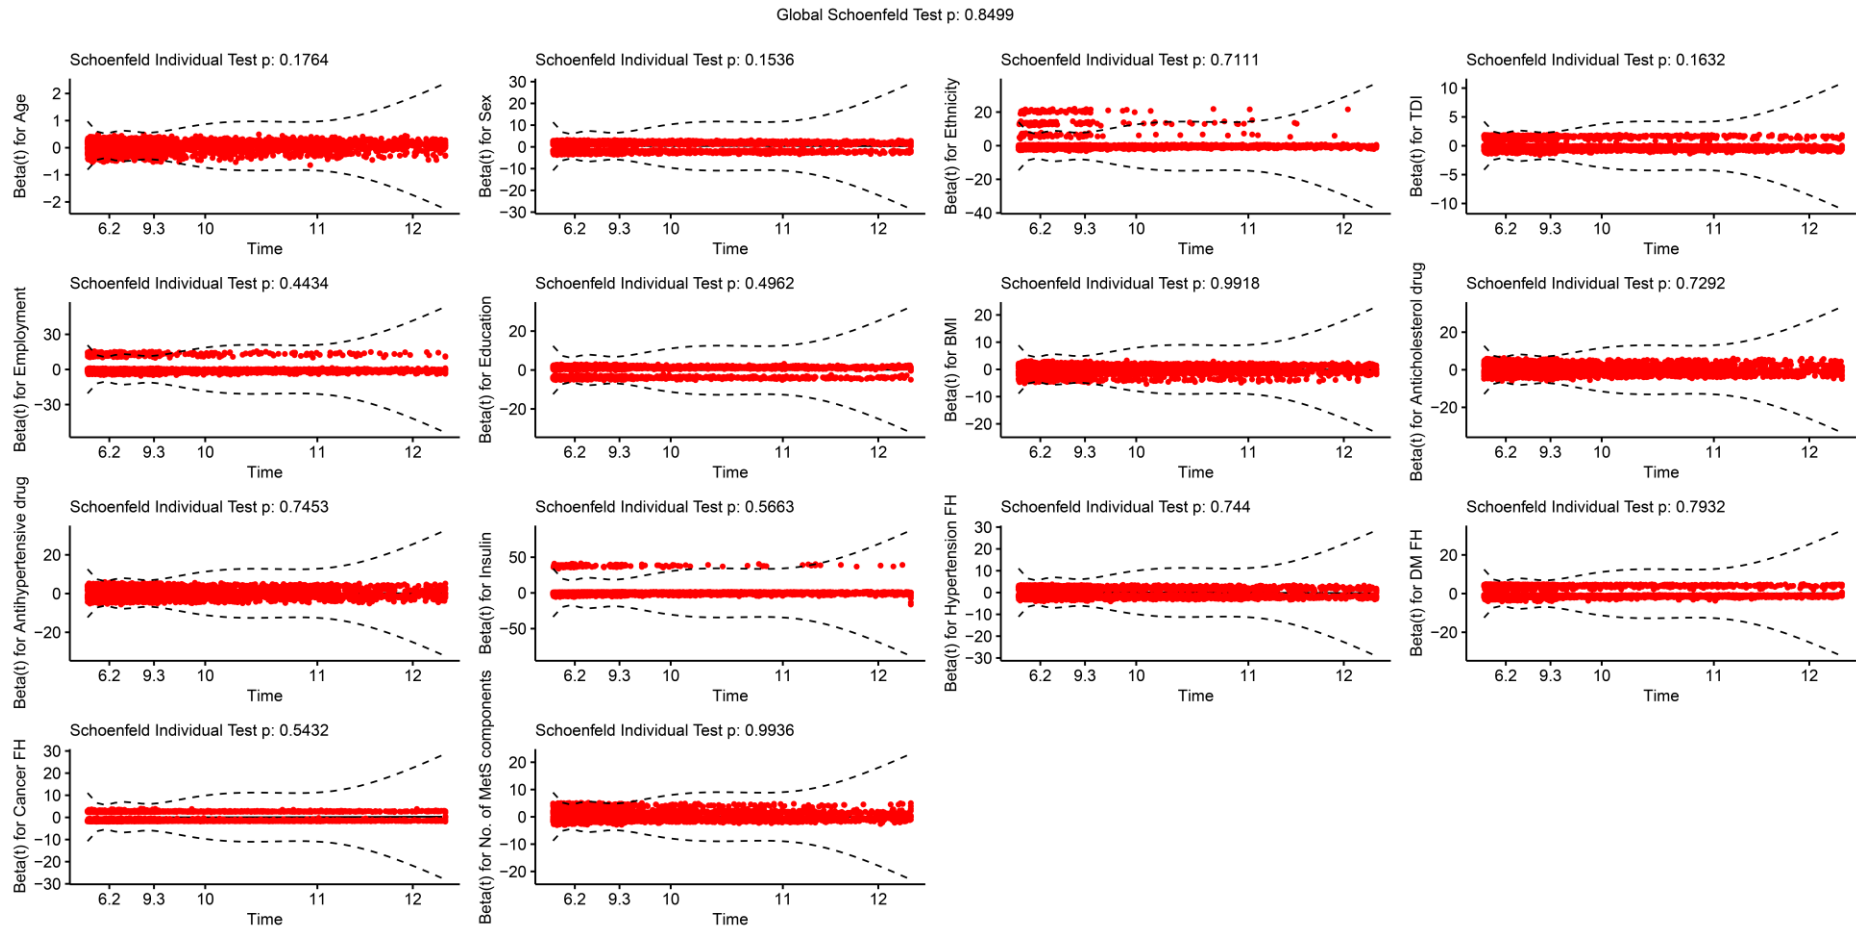

**Figure. S7** Schoenfeld residuals test for overall incident cancer

Abbreviations: TDI, Townsend deprivation index; BMI, body mass index; FH, family history; DM, diabetes mellitus; MetS, metabolic syndrome.

The unit of time is years.

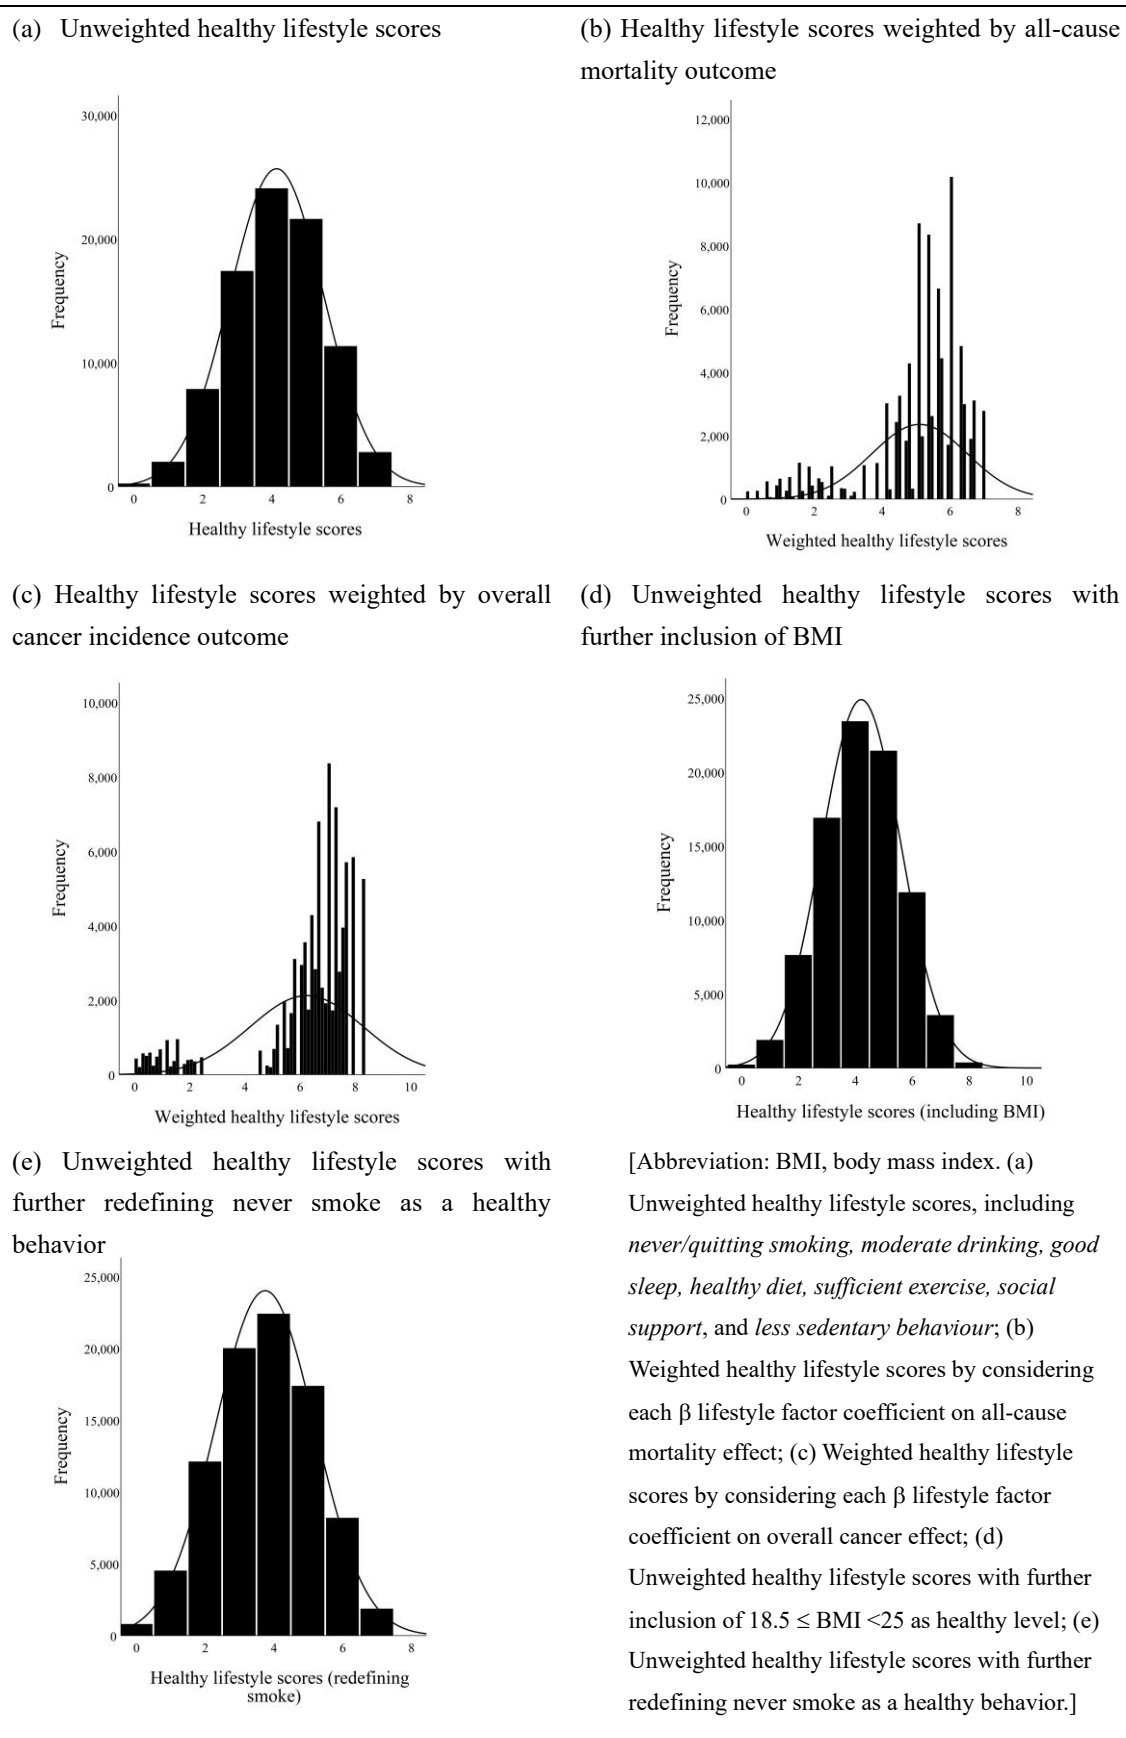

**Figure. S8** Distribution of the healthy lifestyle scores

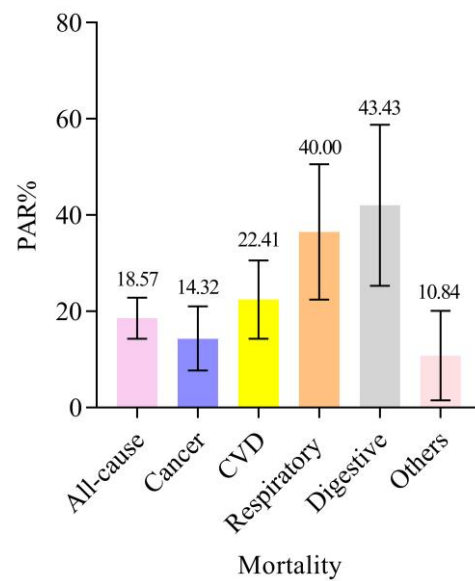

**Figure. S9** Multivariable-adjusted population-attributable risk percents (95% CI) for all-cause and cause-specific mortality according to weighted lifestyle scores

[The PAR% of all-cause and cause-specific mortality attributable to nonadherence to a favorable lifestyle ((highest quintile of weighted lifestyle scores). The multivariable model was adjusted for age at baseline, sex, ethnicity, education, employment status, TDI, BMI categories; medication treatment history for anti-cholesterol drug, antihypertensive drug, and insulin; family history of hypertension, DM, and cancer; and the number of MetS component traits. Abbreviations: PAR%, population-attributable risk percents; CI, confidence interval; CVD, cardiovascular disease.]
